1 **Resting shear elastic modulus as a marker of peripheral fatigue during**  
2 **maximal isometric contractions in humans**

3

4 **Julien SIRACUSA<sup>1\*</sup>, Keyne CHARLOT<sup>1</sup>, Alexandra MALGOYRE<sup>1</sup>, Sébastien CONORT<sup>2</sup>,**  
5 **Pierre-Emmanuel TARDO-DINO<sup>1</sup>, Cyprien BOURRILHON<sup>1</sup>, and Sebastian GARCIA-**  
6 **VICENCIO<sup>1\*</sup>**

7 <sup>1</sup> Unité de Physiologie de l'Exercice et des Activités en Conditions Extrêmes, Département  
8 Environnements Opérationnels, Institut de Recherche Biomédicale des Armées, Brétigny-sur-Orge,  
9 France.

10 <sup>2</sup> Antenne Médicale d'Orléans-Bricy, Base aérienne 123, Bricy.

11 **Short title:** Resting shear elastic modulus and muscle fatigue

12 **\* Corresponding authors:**

13 E-mail: siracusa.julien@gmail.com (JS)

14 sebastian.garciavicencio@gmail.com (SGV)

## 15 Abstract

16 The aim of this study was to investigate whether the resting *Vastus Lateralis* (VL) muscle shear  
17 elastic modulus ( $\mu$ ), evaluated by shear wave elastography, represents peripheral fatigue during  
18 repetition of isometric maximal voluntary contractions (MVCs) of the knee extensor (KE) muscles.

19 Eight healthy well-trained males repeated 60 isometric MVCs of the KE muscles ( $6 \times 10$  MVCs; 5 s  
20 on/5 s off). Single and double electrical stimulations were delivered to the femoral nerve every ten  
21 MVCs during contraction and at rest. The amplitude and properties of the potentiated torque  
22 following single ( $T_{w_{pot}}$ ) double electrostimulation and the amplitude of the concomitant VL  
23 compound action potential were considered to be indicators of peripheral fatigue. The resting VL $\mu$   
24 was measured during a 5-s rest period after each MVC and electrical stimulation series.

25 The resting VL $\mu$  significantly decreased ( $-21.8 \pm 3.9\%$ ;  $P < 0.001$ ) by the end of the fatigue protocol,  
26 decreasing from the 10<sup>th</sup> MVC to the end of the exercise (60<sup>th</sup> MVC) for all participants, with the loss  
27 ranging from 18 to 29%. The potentiated doublet and single twitch torque ( $T_{w_{pot}}$ ) decreased by  $42.5$   
28  $\pm 10.8\%$  and  $55.7 \pm 8.8\%$ , respectively, by the end of exercise ( $P < 0.001$  for both). The relative  
29 mechanical properties of  $T_{w_{pot}}$ , *i.e.* electromechanical delay ( $P < 0.001$ ), contraction time ( $P =$   
30  $0.004$ ), and maximal rate of torque development/relaxation ( $P < 0.001$ ) also changed significantly  
31 during exercise.

32 This study shows that the kinetics of the resting VL $\mu$  is associated with changes in both voluntary  
33 and electrostimulated torque amplitudes and electromechanical properties of the single twitch during  
34 the repetition of maximal voluntary fatiguing exercise. Changes in the resting VL $\mu$  may reflect a  
35 decline in muscle function, *e.g.* impairment of excitation-contraction coupling, contractile processes,

36 and/or elastic properties, throughout the increase in muscle compliance, directly affecting force  
37 transmission.

## 38 Introduction

39 Neuromuscular fatigue (NMF) is classically defined as “an exercise-induced reduction in the ability  
40 of skeletal muscle to produce power or force, irrespective of task completion” [1]. The study of NMF  
41 and underlying mechanisms of recovery, both central and peripheral, is important to prevent overuse  
42 injuries [2] and develop new strategies to enhance muscle recovery [3].

43 NMF and, more specifically, the peripheral modifications that occur within the muscle, at or distal to  
44 the neuromuscular junction [4], have been evaluated by artificial stimulation of the skeletal muscle  
45 and/or motor nerve structures [5-7]. Modifications in mechanical and/or electromyographic (EMG)  
46 response amplitudes delivered by single, double, or tetanic stimulation to a relaxed muscle are  
47 considered to be good indicators of peripheral fatigue [1]. More specifically, the study of these  
48 electrically-induced responses allows non-invasive investigation of changes of the (i) neuromuscular  
49 propagation/transmission of action potentials along the sarcolemma, (ii) excitation-contraction  
50 coupling, (iii) cross-bridge cycle, and (iv) intrinsic force [1, 4, 8-11]. Moreover, electromechanical  
51 properties of single twitches, such as electromechanical delay (EMD), contraction time (CT), half-  
52 relaxation time (HRT), and their first derivatives may also reflect mechanical and electrochemical  
53 alterations, such as elastic properties, of skeletal muscle related to the capacity of force transmission  
54 [12-14].

55 Aside from contractile mechanisms, the decrease in voluntary and/or electrically induced force with  
56 fatigue also depends on the elongation capacity of elastic components, both in series and in parallel,  
57 (*i.e.* connective tissue, tendons), in transmitting force [12]. It has been well demonstrated that fatigue  
58 can increase muscle-tendon complex compliance due to repetitive cycles of long-lasting contractions  
59 [2, 15, 16]. Higher muscle-tendon compliance would furthermore suggest a longer time for force  
60 transmission to the bone due to the inability to store and release elastic energy, which can lead to a

61 higher risk of muscle-tendon complex injury [16, 17]. The use of real time ultrasonography has made  
62 it possible to assess the displacement of human tendons and aponeurotic structures during voluntary  
63 contractions to determine a muscular stiffness index *in vivo* [18-20]. However, these techniques  
64 reflect modifications in the stiffness of several structures (muscles, tendons, nerves, and skin) acting  
65 around a given joint and not solely stiffness of the muscular tissue. Moreover, conventional  
66 ultrasonography techniques often require maximal voluntary contractions (MVC), which may limit  
67 its use in clinical cases or acute fatigue states. Thus, the relationship between changes in specific  
68 muscle stiffness during fatiguing conditions and its role in muscle performance is therefore unclear  
69 and needs to be investigated.

70 Shear-wave elastography (SWE) is a very promising alternative which provides reliable and  
71 quantitative real-time assessment of specific muscular tissue stiffness at rest and during isometric  
72 contractions or passive stretching [21-23]. Unlike conventional ultrasound elastographic methods,  
73 SWE is not based on manual compression or the extent of tissue displacement [24]. This technique  
74 provides a tissue stiffness index based on tissue shear-wave propagation velocity measurements  
75 induced by an acoustic radiation force. The shear-wave propagation velocity directly correlates with  
76 the muscle shear elastic modulus ( $\mu$ ) in a homogeneously elastic medium, which is assumed to be the  
77 case for muscle tissue [25, 26]. Although changes in  $\mu$  have been well studied after damaging  
78 exercise [27-29], there is no consensus concerning its modification after fatiguing conditions. For  
79 example, Bouillard *et al.* [30] reported that the dynamic  $\mu$ , evaluated during voluntary contractions  
80 by SWE, closely followed declines in voluntary torque during fatiguing caused by submaximal  
81 sustained isometric contractions. Moreover, they showed that its amplitude was affected if fatigue  
82 was preliminarily induced *versus* a control non-fatigued session [31]. Andonian *et al.* [32] found that  
83 the resting  $\mu$  of the quadriceps was lower immediately after an extreme mountain ultra-marathon, in  
84 which a high level of fatigue is experienced. In contrast, Lacourpaille *et al.* [29] demonstrated that

85 the resting  $\mu$  was not modified after fatiguing concentric contractions, suggesting that it is not  
86 influenced by metabolic changes within the muscle or by peripheral fatigue. However, in their study,  
87 30 isokinetic (at  $120^\circ\cdot s^{-1}$ ) concentric contractions of the elbow flexor muscles did not induce a  
88 significant decrease in voluntary torque, limiting conclusions concerning the relationship between  
89 fatigue and changes in resting  $\mu$  (muscle stiffness). Thus, the kinetics of the resting  $\mu$  during repeated  
90 maximal fatiguing contractions and its relationship with modifications of neuromuscular indicators of  
91 peripheral fatigue (*i.e.* changes in mechanical and EMG responses) is still unknown.

92 The decline in muscle function during and after fatiguing contractions, closely associated with  
93 greater muscle-tendon complex compliance [16] and the impairments in mechanical and  
94 electrochemical properties of skeletal muscle related to force transmission [12, 13], suggest that  
95 repetition of isometric MVCs could induce a progressive decline in resting  $\mu$  over the fatigue  
96 protocol. Thus, modifications of resting  $\mu$  may be associated with changes in electrically stimulated  
97 mechanical (single and double) and EMG (M-wave) responses, which are strongly affected when the  
98 muscle is exercised isometrically at maximal intensity for a short time [33, 34]. The aim of this study  
99 was to investigate whether the resting  $\mu$  evaluated by SWE is a good indicator of peripheral fatigue  
100 and reflects changes in the mechanical and elastic properties of muscles (*i.e.* increases in muscle  
101 compliance) during the repetition of isometric MVCs of KE muscles in humans.

## 102 **Materials and methods**

### 103 **Participants**

104 Eight strength- and-endurance trained French Army soldiers volunteered to participate in the present  
105 study. Their anthropometrical and physiological characteristics were as follows: age:  $29 \pm 2.6$  years,  
106 weight:  $74 \pm 5.2$  kg, height:  $1.7 \pm 0.1$  m, BMI:  $28.8 \pm 2.3$  kg·m<sup>-2</sup>, VO<sub>2max</sub> relative to BMI:  $53.6 \pm 4.7$   
107 ml·min<sup>-1</sup>·kg<sup>-1</sup>, and body fat percentage:  $11.1 \pm 2.9\%$ . They performed regular physical activity, such  
108 as strength training, running, and/or cross training (between 6 and 15 h/week), with no recent history  
109 of muscular, joint, or bone disorders or receiving any medication that could interfere with  
110 neuromuscular responses. This study was part of a medico-physiological follow-up performed at the  
111 request of the French Army. All the volunteers were fully informed of the experimental procedures,  
112 aims, and risks and gave their written assent before any testing was conducted. Each participant  
113 participated in an inclusion session consisting of (i) a complete medical examination with  
114 anthropometric data collection, (ii) a standardized incremental maximal aerobic test, and (iii)  
115 complete familiarization with the experimental procedures. This study was approved by the scientific  
116 leadership of the French Armed Forces Biomedical Research Institute. All experiments were  
117 conducted in accordance with the Helsinki Declaration [35].

### 118 **Anthropometrical measurements**

119 Body mass was measured to the nearest 0.1 kg using a calibrated scale and height was determined to  
120 the nearest 0.01 m using a standing stadiometer. Height and body mass were measured without shoes  
121 and while wearing underwear. The body mass index was computed by dividing the mass by the  
122 height squares (kg·m<sup>-1</sup>). The percentage of body fat was estimated using skinfold thickness values  
123 and Durnin & Womersley standard equations [36]. Skinfold thickness values were measured to the

124 nearest millimeter, in triplicate, at the biceps, triceps, and subscapular, and supriliac points on the  
125 right side of the body using a Harpenden skinfold caliper (British Indicators, West Sussex, UK). The  
126 same investigator performed all measurements.

## 127 **Intermittent voluntary fatigue protocol**

128 After a 10-min warm-up at submaximal intensity, participants performed an intermittent voluntary  
129 fatigue protocol consisting of  $6 \times 10$  repetitions of alternating isometric 5-s MVCs of the KE muscles  
130 and 5-s passive recovery periods (**Fig 1**). The number of contractions was chosen to generate a high  
131 level of voluntary strength loss and peripheral fatigue, as demonstrated previously in adults [34].  
132 Double and single electrical stimulations were delivered to the femoral nerve before and every ten  
133 MVCs, during the contractions and at rest, to determine the kinetics of central and peripheral  
134 neuromuscular fatigue (*see below*). Moreover, a linear transducer was fixed to the skin, using a  
135 custom-made system, over the *Vastus Lateralis* muscle (VL) and used in SWE mode  
136 (musculoskeletal preset) to capture the shear-wave propagation velocity. After each MVC and  
137 electrical-stimulation series, the resting *Vastus Lateralis* shear elastic modulus ( $VL\mu$ ) was measured  
138 during a 5-s period to ensure reproducibility of the measurements, as proposed by Andonian *et al.*,  
139 [32]. Participants were asked to stay as relaxed as possible and, after stabilization of the elastography  
140 2D color map, a 5-s clip was recorded. The passive right leg KE torque and VL and *biceps femoris*  
141 (BF) EMG activity were evaluated to control for any unwanted muscle contraction in real time.  
142 Participants were not informed of the criterion of task failure (60-MVCs) but had visual feedback of  
143 the torque output during the exercise. They were also strongly encouraged by the experimenters  
144 during the entire fatiguing task.

145 **Fig 1. Design of the voluntary intermittent fatigue protocol.** This protocol consisted of a series of  
146 voluntary force and electrical stimulation and muscle shear-wave elastography measurements



147 performed before the series and during and after every 10 MVC. KE: knee extensors; KF: knee  
148 flexors; MVC: maximal voluntary contraction; SWE: shear-wave elastography; EMG: surface  
149 electromyography; RMS: root mean square; VL: *Vastus Lateralis*; BF: biceps femoris.

150

## 151 **Neuromuscular function measurements**

### 152 **Femoral nerve electrical stimulation**

153 Evoked contractions of the KE muscles were triggered with a constant-current stimulator (Digitimer  
154 DS7A, Hertfordshire, UK). Single and double square-wave pulses of 1,000  $\mu$ s, at maximal voltage  
155 (400 V), were delivered percutaneously to the femoral nerve using a self-adhesive electrode (10-mm  
156 diameter, Ag-AgCl, Type 0601000402, Controle Graphique Medical, Brie-Comte-Robert, France).  
157 The cathode was placed in the femoral triangle, 3-5 cm below the inguinal ligament. The anode, a  
158 5 $\times$ 10 cm self-adhesive stimulation electrode (Medicompex SA, Ecublens, Switzerland) was placed at  
159 the gluteal fold. Small spatial adjustments were initially performed using a ball probe cathode  
160 pressed into the femoral triangle to determine the optimal stimulation site. This site corresponded to  
161 the position in which the greatest un-potentiated KE single twitch ( $T_w$ ) amplitude and concomitant  
162 VL compound muscle action potential ( $M_{max}$ ) amplitude were induced. The optimal stimulation  
163 intensity, *i.e.* the intensity at which maximal un-potentiated  $T_w$  and concomitant VL M-wave  
164 amplitudes started to plateau, was determined from a progressive recruitment curve. Briefly, simple  
165 pulses were induced every 15 s from 40 to 99 mA in 5-mA increments. The supramaximal  
166 stimulation intensity ranged from 52 to 91 mA and corresponded to 130% of the optimal intensity.

## 167 **Isometric maximal voluntary contraction**

168 Maximal voluntary and electrically stimulated contractions were assessed under isometric conditions  
169 with an isokinetic dynamometer (Cybex Norm, Lumex, Ronkonkoma, NY, USA). Participants were  
170 comfortably positioned on an adjustable chair with the hip joint flexed at 30° (0° = neutral position).  
171 The dynamometer lever arm was attached 1-2 cm above the lateral malleolus with a Velcro strap. The  
172 lever arm was home-built and included a high-density foam pad, placed against the posterior aspect  
173 of the leg, and a Velcro strap positioned over the anterior aspect of the leg. This configuration was  
174 chosen to reduce cushioning and improve torque transmission and resolution, which is critical when  
175 evaluating twitch contractile properties and the voluntary activation level [1]. The axis of rotation of  
176 the dynamometer was aligned with the lateral femoral condyle of the femur. The participants were  
177 secured firmly with Velcro straps across the hips and chest to minimize upper body movement.  
178 During each MVC, participants were instructed to grip the seat to stabilize the pelvis. Before the  
179 voluntary fatigue protocol, three 5-s MVCs of the KE and two of the knee flexors (KF) were  
180 performed, with 60-s passive recovery periods. The means were defined as the control “non-fatigued”  
181 values. Absolute KE and KF torque was determined as the peak force reached during maximal  
182 efforts. All measurements were taken from the participant’s dominant leg (right leg for all  
183 participants), which was fixed at 90° (0°= knee fully extended). This muscle length was selected to  
184 ensure a good reliability of the neuromuscular assessments. Indeed, it is a length close to the optimal  
185 angle of force generating capacity and, at this position the quadriceps muscle is relatively lengthened.  
186 These last arguments allow us to induce a greater extent of peripheral fatigue and to detect easily  
187 muscle stiffness modifications.

188 Torque data was corrected for gravity using Cybex software and was acquired and digitized on-line at  
189 a rate of 2 kHz by an A/D converter (Powerlab 8/35, ADInstruments, New South Wales, Australia)  
190 driven by Labchart 8.0 Pro software (ADInstruments).

## 191 **Electrically evoked torque and maximal voluntary activation Level**

192 The double pulse (stimulated at 100 Hz) superimposition technique, based on the interpolated-twitch  
193 method [37], enabled us to estimate the maximal KE voluntary activation level (VAL). Briefly,  
194 superimposed ( $Db_{s100Hz}$ ) and potentiated ( $Db_{pot100Hz}$ ) double stimulations were delivered during MVC  
195 after the torque had reached a plateau and 3-s after cessation of the contraction, respectively. This  
196 allowed us to obtain a potentiated mechanical response and hence reduce the variability of the VAL  
197 values [38]. The superimposed doublet was preferred to a superimposed single  $T_w$  because it results  
198 in a greater signal-to-noise ratio and thus allows the detection of small changes in VAL [39]. The  
199 ratio of the amplitude of the  $Db_{s100Hz}$  over that of the  $Db_{pot100Hz}$  for the relaxed muscle (control  
200 doublet) was then calculated to obtain the VAL, (i.e. indicator of central fatigue), as follows:

$$201 \quad \text{VAL (\%)} = \left[ 1 - \left( \frac{Db_{s100Hz}}{Db_{pot100Hz}} \right) \right] \times 100$$

202 After cessation of the contraction and 3-s after the  $Db_{pot100Hz}$ , a low frequency (10 Hz) doublet  
203 stimulus and a single  $T_w$  were delivered to the relaxed muscle in a potentiated state ( $T_{wpot}$ ; 3-s  
204 between; **Fig 1**) [40]. This set of measurements (MVC with superimposed doublet + evoked stimuli  
205 to the relaxed muscle) was repeated before the fatigue protocol and every ten MVCs. Peak torque and  
206 the  $Db_{pot10Hz}$ -to- $Db_{pot100Hz}$  ratio ( $Db_{10:100}$ ) was then calculated from double pulses; any decrease in  
207 this ratio is commonly interpreted as an index of low-frequency fatigue, *i.e.* the preferential loss of  
208 force at low frequencies of electrical stimulation [41]. The following parameters were also obtained  
209 from the  $T_{wpot}$  response: peak torque (Pt), EMD, CT, HRT, maximal rate of torque development  
210 (MRTD), *i.e.* the maximal value of the first derivative of the mechanical signal divided by the peak  
211 torque, maximal rate of torque relaxation (MRTR), *i.e.* the maximal value of the first derivative of  
212 the mechanical signal divided by the peak torque.

## 213 **EMG activity**

214 The EMG signals of the VL and BF muscles were recorded, during voluntary and evoked  
215 contractions, using bipolar silver chloride surface electrodes (Blue Sensor N-00-S, Ambu, Denmark).  
216 The recording electrodes were taped lengthwise to the skin over the muscle belly, as recommended  
217 by SENIAM [42], with an inter-electrode distance of 20 mm. The reference electrode was attached to  
218 the patella. Low impedance ( $Z < 5 \text{ k}\Omega$ ) at the skin-electrode surface was obtained by shaving, gently  
219 abrading the skin with thin sand paper, and cleaning with alcohol. EMG signals were amplified (Dual  
220 Bio Amp ML 135, ADInstruments, Australia) with a bandwidth frequency ranging from 10 to 500  
221 Hz (common mode rejection ratio  $> 85 \text{ dB}$ , gain = 1,000) and simultaneously digitized together with  
222 the torque signals. The sampling frequency was 2 kHz. During the fatigue protocol, the root mean  
223 square (RMS) values of the VL EMG activity were calculated during the MVC trials over a 0.5-s  
224 period after the torque had reached a plateau and before the superimposed stimulation was evoked.  
225 This RMS value was then normalized to the maximal peak-to-peak amplitude of the potentiated VL  
226 M-wave ( $\text{RMS} \times M_{\text{max}}^{-1}$ ).

## 227 **Antagonist coactivation level**

228 The level of antagonist coactivation of the BF muscle ( $\text{Co-Act}_{\text{BF}}$ , %) was computed as the BF EMG  
229 activity during knee extensions (KE), normalized to the maximal BF EMG activity recorded during a  
230 maximal knee flexion (KF). To record this maximal BF RMS value, the participants were asked to  
231 twice perform 3-s maximal voluntary isometric contractions of the KF before the fatigue protocol.  
232 This measurement was performed at a  $90^\circ$ -knee angle. The best trial was used for subsequent  
233 analysis.

$$234 \quad \text{CoActBF (\%)} = \frac{(\text{RMS KE} \times 100)}{\text{RMS KF}}$$

## 235 **Shear-Wave Elastography**

236 An Aixplorer ultrasound scanner (version 12.2; Supersonic Imagine, Aix-en-Provence, France)  
237 coupled with a linear transducer array (4–15 MHz, SuperLinear 15-4; Vermon, Tours, France) was  
238 used in shear-wave elastography mode (musculoskeletal preset), as previously described [25].  
239 Briefly, The SWE technique is based on ultrafast ultrasound sequences that are performed to capture  
240 shear-wave propagation. The SWE technique relies on the acoustic radiation force to remotely  
241 generate low-frequency shear-waves in tissues, (e.g., muscle, breast, liver), and can be achieved  
242 using the same piezoelectric arrays as those used in conventional ultrasonic scanners [25]. The shear-  
243 wave displacement field is saved via one-dimensional cross-correlation of consecutive radio  
244 frequency signals along the ultrasound beam axis as a function of time. The shear-wave speed is then  
245 calculated in each pixel of the resulting image using a time-of-flight algorithm on the displacement  
246 movies. The shear-wave propagation velocity, typically a few meters per second in soft tissues,  
247 correlates directly with the muscle shear elastic modulus ( $\mu$ ) if the medium is assumed to be purely  
248 elastic, which is well accepted in muscle elastography studies [25, 26]. The  $\mu$  was obtained as  
249 follows:

$$250 \quad \mu = \rho \times V_s^2$$

251 where  $\rho$  is the muscle density (1,000 kg·m<sup>-3</sup>) and  $V_s$  is the shear wave speed (in m·s<sup>-1</sup>). This equation  
252 implicitly neglects viscous effects. Studies revealed that the shear-wave velocity is almost  
253 independent of the frequency of the mechanical shock when measured longitudinally by SWE,  
254 demonstrating no significant viscous effects [26].

255 An ultrasound probe was placed on the VL muscle at 50% of the distance between the major  
256 trochanter and the lateral border of the patella. This position corresponds to the maximal VL ACSA.  
257 Then, the probe was aligned in the muscle shortening direction. The VL muscle was chosen because

258 it is more sensitive to changes in stiffness than the head of the quadriceps muscle (*rectus femoris*)  
259 after fatiguing from long-duration exercise [22]. Moreover, studies showing decreases in muscle  
260 stiffness by assessing aponeurosis or muscle tendon junction displacements after repeated isometric  
261 contractions were made exclusively in the VL muscle [2, 16] allowing future comparisons with the  
262 present study. Shear-wave elastography measurements were carefully standardized by fixing the  
263 ultrasound probe using a custom-made system placed over the skin and coating it with a water-  
264 soluble transmission gel (Aquasonic, Parker laboratory, Fairfield, NJ, USA) to improve acoustic  
265 coupling. The B-mode ultrasound was first set to determine the optimal probe location and maximize  
266 the alignment between the transducer and the direction of the muscle fascicles. Probe alignment was  
267 considered to be correct when VL muscle fascicles and aponeurosis could be delineated without  
268 interruption across the image. A probe orientated in parallel to the muscle fascicles provided the most  
269 reliable muscle elasticity measurements [43]. After probe positioning, a fixed-size square region of  
270 interest (ROI;  $\sim 1.5 \text{ cm}^2$ ), *i.e.* a region in which shear-wave propagation was analyzed within the  
271 muscle, was placed in the middle of the B-mode image below the superficial aponeurosis within the  
272 VL muscle. A 2D real-time color map of the shear elastic modulus was then obtained at 1 Hz with a  
273 spatial resolution of  $1 \times 1 \text{ mm}$  (**Fig 2A**). Finally, a 5-s clip was performed when the 2D real-time color  
274 map was maximally homogeneous to avoid any influence of the previous muscle contraction. During  
275 scans, the knee joint was positioned at  $90^\circ$  ( $0^\circ$  = knee fully extended) and participants were asked to  
276 stay as relaxed as possible. Passive KE torque and VL and BF EMG activity were continuously and  
277 carefully monitored to verify this relaxed position.

278

279 **Fig 2. Shear-wave elastography.** (A) 2D real-time color map of the shear elastic modulus in the  
280 *Vastus Lateralis* muscle obtained at 1 Hz with a spatial resolution of  $1 \times 1 \text{ mm}$ . ROI: region of  
281 interest. (B) Participant positioning on the isokinetic ergometer with the probe fixation system placed

282 over the right thigh. (C) A representative scheme of evolution of the 2D color map muscle shear  
283 elastic modulus for one individual.

284

285 The Aixplorer scanner provided Young's modulus measurements, ( $E = 3 \times p \times V_s^2$ ). The Young's  
286 modulus calculation assumes that the material is isotropic, which is clearly not true for muscle [44].  
287 Thus, all measurements were divided by three to obtain the shear elastic modulus ( $\mu$ ), as in the  
288 equation. The resting  $\mu$  values were averaged over the largest ROI. The average of the five  
289 consecutive images (five values were recorded at one sample per second), obtained during the clip,  
290 was used for subsequent analyses. Reproducibility of the scans was also determined for each  
291 measurement. DICOM images were then transferred to a workstation and analyzed using a  
292 MATLAB ROI interface treatment script developed in our laboratory (MathWorks, Natick, MA).

293

294 *“Please insert Fig 2 near here”*

## 295 **Statistical Analysis**

296 The data were screened for normality of the distribution and homogeneity of variances using the  
297 Shapiro-Wilk normality and Levene tests, respectively. Differences in absolute values and relative  
298 changes (relative to control values) were analyzed by one-way ANOVA (effect: number of  
299 repetitions) with repeated measures. If the ANOVA revealed significant effects or interactions  
300 between factors, Fisher's LSD *post-hoc* test was applied to test the discrimination between means.  
301 The intrasession repeatability of the resting shear elastic modulus was evaluated for the VL muscle  
302 between each five measurements, obtained during the 5-s movie, by calculating the intraclass  
303 correlation coefficient (ICC) and standard error of measurement (SEM) [45]. Results with a P value <

304 0.05 were considered to be significant. Statistical procedures were performed using Statistica 8.0  
305 software (Statsoft Inc, USA). The results are presented as absolute values (mean  $\pm$  SD) in **Table 1**.  
306 Data presented in **Figs 3-5** are expressed as the percentage of their initial value for the sake of clarity.



307 **Table 1. Kinetics of absolute neuromuscular and elastographic values.**

|                                     | Ctrl          | MVC10            | MVC20            | MVC30            | MVC40            | MVC50            | MVC60            | Time effect |
|-------------------------------------|---------------|------------------|------------------|------------------|------------------|------------------|------------------|-------------|
| KE MVC (Nm)                         | 361.2 ± 72.2  | 275.8 ± 42.9 *** | 212.3 ± 46.7 *** | 196.0 ± 40.3 *** | 186.0 ± 31.0 *** | 178.2 ± 31.2 *** | 194.2 ± 31.5 *** | P<0,001     |
| <b>Nervous factors</b>              |               |                  |                  |                  |                  |                  |                  |             |
| KE VAL (%)                          | 89.7 ± 1.5    | 90.1 ± 3.3       | 86.3 ± 7.7       | 85.1 ± 6.6       | 82.3 ± 9.3 *     | 81.9 ± 6.9 *     | 81.9 ± 6.2 *     | P=0,0401    |
| BF Co-Act (%)                       | 24.0 ± 6.9    | 23.7 ± 7.1       | 22.9 ± 6.4       | 23.7 ± 7.6       | 23.8 ± 8.5       | 24.9 ± 9.8       | 26.5 ± 10.0      | NS          |
| VL RMS/M_pot (A.U)                  | 0.07 ± 0.03   | 0.06 ± 0.03      | 0.06 ± 0.03      | 0.06 ± 0.02      | 0.05 ± 0.02      | 0.06 ± 0.02      | 0.06 ± 0.02      | NS          |
| <b>Muscular factors</b>             |               |                  |                  |                  |                  |                  |                  |             |
| KE Db100Hz_pot (Nm)                 | 108.9 ± 11.1  | 88.9 ± 14.2 **   | 71.5 ± 15.5 ***  | 63.7 ± 14.1 ***  | 62.4 ± 12.7 ***  | 64.3 ± 11.6 ***  | 62.4 ± 12.4 ***  | P<0,001     |
| KE Tw_pot (Nm)                      | 75.5 ± 6.8    | 53.9 ± 8.8 ***   | 38.7 ± 11.3 ***  | 34.3 ± 9.4 ***   | 34.6 ± 9.6 ***   | 35.7 ± 7.9 ***   | 33.7 ± 9.0 ***   | P<0,001     |
| Ratio Db10:100Hz (A.U)              | 0.7 ± 0.1     | 0.6 ± 0.1 **     | 0.5 ± 0.1 ***    | 0.5 ± 0.0 ***    | 0.6 ± 0.1 ***    | 0.6 ± 0.1 ***    | 0.5 ± 0.1 ***    | P<0,001     |
| Shear Modulus (kPa)                 | 8.1 ± 2.5     | 7.6 ± 2.4        | 7.6 ± 2.4        | 7.4 ± 2.3        | 7.2 ± 2.2        | 7.1 ± 2.3        | 6.3 ± 1.9        | NS          |
| <b>Twitch mechanical properties</b> |               |                  |                  |                  |                  |                  |                  |             |
| EMD (ms)                            | 21.9 ± 1.6    | 23.6 ± 2.2       | 23.9 ± 1.8 *     | 24.8 ± 1.7 **    | 24.9 ± 1.7 **    | 25.3 ± 1.9 ***   | 26.4 ± 1.4 ***   | P<0,001     |
| CT (ms)                             | 54.8 ± 4.0    | 58.1 ± 4.5       | 60.1 ± 2.6 *     | 60.9 ± 4.1 *     | 61.1 ± 3.6 *     | 64.3 ± 6.6 ***   | 65.6 ± 6.5 ***   | P<0,001     |
| MRTD (Nm/ms)                        | 7.3 ± 2.5     | 6.0 ± 2.8        | 4.0 ± 1.6 ***    | 3.5 ± 1.5 ***    | 3.4 ± 1.7 ***    | 3.4 ± 1.2 ***    | 3.1 ± 1.2 ***    | P<0,001     |
| HRT (ms)                            | 177.6 ± 158.4 | 138.5 ± 80.0     | 113.9 ± 43.0     | 108.7 ± 45.6     | 116.3 ± 54.0     | 99.7 ± 22.7      | 108.6 ± 46.5     | NS          |
| MRTR (Nm/ms)                        | 2.1 ± 0.9     | 1.7 ± 0.7        | 1.2 ± 0.6 ***    | 1.0 ± 0.4 ***    | 1.0 ± 0.4 ***    | 1.0 ± 0.3 ***    | 0.9 ± 0.3 ***    | P<0,001     |
| <b>VL M wave</b>                    |               |                  |                  |                  |                  |                  |                  |             |
| Pic-to-Pic Amplitude (mV)           | 5.7 ± 3.6     | 5.4 ± 3.3        | 5.3 ± 3.2        | 5.3 ± 3.2        | 5.3 ± 3.1        | 4.8 ± 3.1        | 5.0 ± 2.9        | NS          |
| <b>Rest neuromuscular outcomes</b>  |               |                  |                  |                  |                  |                  |                  |             |
| KE Passive Torque (Nm)              | 0.4 ± 0.2     | 0.3 ± 0.1        | 0.5 ± 0.3        | 0.5 ± 0.2        | 0.5 ± 0.2        | 0.5 ± 0.2        | 0.8 ± 0.9        | NS          |
| VL Passive RMS (mV)                 | 0.007 ± 0.006 | 0.007 ± 0.006    | 0.006 ± 0.005    | 0.005 ± 0.004    | 0.005 ± 0.004    | 0.004 ± 0.003    | 0.004 ± 0.003    | NS          |
| BF Passive RMS (mV)                 | 0.003 ± 0.002 | 0.003 ± 0.002    | 0.002 ± 0.001    | 0.002 ± 0.001    | 0.002 ± 0.000    | 0.002 ± 0.000    | 0.002 ± 0.000    | NS          |

308

309 NS: Non significative result

## Results

### Maximal voluntary torque

ANOVA revealed significant absolute and relative (to the control “non-fatigued” value) repetition-dependent effects on MVC torque ( $P < 0.001$ , **Fig 3A**). MVC decreased by  $44.4 \pm 13.4\%$  by the end of the exercise ( $P < 0.001$ ), with a significant reduction starting from the 10<sup>th</sup> MVC ( $P = 0.0036$ ).

**Fig 3. Time course of the voluntary and electrostimulated neuromuscular outcomes during the entire fatigue protocol.** (A) Evolution (%) of the maximal voluntary contraction (MVC; ■) amplitude. (B). Evolution (%) of double ( $Db_{100Hz\_pot}$ ; ■) and single ( $T_{w\_pot}$ ; ▲) pulses induced by electrical stimulation. (C) Evolution (%) of low-frequency fatigue (LFF; ■), calculated as the ratio between the double pulses induced at 10 Hz and 100 Hz. The evolution (%) of the resting shear elastic modulus of the *Vastus Lateralis* (VL) muscle (□) is shown in each panel. Significant differences from the first MVC: \*  $P < 0.05$ , \*\* $P < 0.01$ , and \*\*\* $P < 0.001$ .

### Peripheral mechanisms of fatigue

#### Electrically-stimulated potentiated torque

ANOVA revealed a significant repetition-dependent effect for both absolute and relative  $Db_{pot100Hz}$  and  $T_{wpot}$  torque similar to that of MVC ( $P < 0.001$ , **Fig 3B**).  $Db_{pot100Hz}$  and  $T_{wpot}$

torque decreased by  $42.5 \pm 10.8\%$  and  $55.7 \pm 8.8\%$  by the end of the exercise, respectively ( $P < 0.001$ ). Reductions in both relative  $Db_{pot100Hz}$  and  $T_{wpot}$  torque values started from the 10<sup>th</sup> MVC ( $P < 0.001$  for both), similarly to MVC.

### **Db10:100 ratio**

ANOVA revealed a significant repetition-dependent effect for both the absolute and relative Db10:100 ratio ( $P < 0.001$ , **Fig 3C**). The Db10:100 ratio significantly decreased by 12.4% ( $P = 0.0012$ ) from the 10<sup>th</sup> MVC to  $22.7 \pm 8\%$  ( $P < 0.001$ ) by the end of the exercise.

### **Electro-Mechanical properties of single twitch torque**

ANOVA revealed a significant repetition-dependent effect for both absolute and relative EMD and CT ( $P < 0.01$ , **Figs 4A and B**). The EMD and CT significantly increased during the fatigue protocol, reaching  $121.1 \pm 6.4\%$  and  $120.3 \pm 14.5\%$  of their initial values, respectively, ( $P < 0.001$  for both) by the end of the exercise. Moreover, the values significantly increased from the 10<sup>th</sup> MVC for EMD ( $+8.0 \pm 6.2\%$ ,  $P = 0.044$ ) and the 20<sup>th</sup> MVC for CT ( $+10.1 \pm 7.7\%$ ,  $P = 0.0482$ ). Moreover, the absolute and relative MRTD and MRTR significantly decreased by the end of the exercise:  $56.7 \pm 9\%$  ( $P < 0.001$ ) for the MRTD and  $53.8 \pm 14.7\%$  ( $P < 0.001$ ) for the MRTR (ANOVA:  $P < 0.001$  for both).

**Fig 4. Time course of the electromechanical properties of the single twitch pulse during the entire fatigue protocol.** (A) Evolution (%) of the electromechanical delay (EMD; ■) amplitude. (B) Evolution (%) of the contraction time (CT; ■) and half relaxation time (HRT; ▲). (C) Evolution (%) of the maximal rate of torque development (MRTD; ■) and maximal rate of torque

relaxation (MRTR; ▲). The evolution (%) of the resting shear elastic modulus of the *Vastus Lateralis* (VL) muscle (□) is shown in each panel. Significant differences from the first MVC: \*  $P < 0.05$ , \*\*  $P < 0.01$ , and  $P < 0.001$ .

### **Potentiated Vastus Lateralis M-wave amplitude**

There were no significant changes in the potentiated VL  $M_{\max}$  amplitude during the entire fatigue protocol (**Table 1**).

### **VL resting shear elastic modulus**

The measurements were reproducible (five measurements obtained during a 5-s clip) throughout the fatigue protocol. The ICC (95% CI) and SEM (kPa) values were as follows for each measurement: Control (99.5%, 0.2 kPa), MVC10 (99.5%, 0.24 kPa), MVC20 (98.9, 0.27 kPa), MVC30 (99.0%, 0.26 kPa), MVC40 (96.7%, 0.27 kPa), MVC50 (99.0%, 0.26 kPa), and MVC60 (97.5%, 0.26kPa).

The kinetics of the relative resting  $\mu$  (in %) is presented in each figure. A representative scheme of the kinetics of the 2D color map of the muscle  $\mu$  is presented in **Fig 2C**. ANOVA revealed a significant repetition-dependent effect for the relative resting VL $\mu$  ( $P < 0.001$ ). It significantly decreased progressively from the 10<sup>th</sup> MVC ( $-6.8 \pm 6.2\%$ ,  $P = 0.0123$ ) to the end of the exercise ( $-21.8 \pm 3.9\%$ ,  $P < 0.001$ ). The kinetics of the individual absolute values (kPa) of all subjects are presented in **Fig 5**.

**Fig 5. Time course of individual resting shear elastic modulus of the *Vastus Lateralis* muscle.** The evolution of resting shear elastic modulus of the Vastus Lateralis (KPa) is represented for each participant before (Ctrl) and each 10 repetitions of the 10 x 6 sets of isometric maximal voluntary contraction of the knee extensor muscles of the fatigue protocol.

## Central mechanisms of fatigue

### Voluntary activation level

Absolute VAL values are shown in **Table 1**. ANOVA showed a significant repetition-dependent effect for both absolute ( $P = 0.036$ ) and relative ( $P = 0.015$ ) VAL values. The KE VAL declined from the 40<sup>th</sup> ( $-8.3 \pm 9.8\%$ ,  $P = 0.016$ ) to the 60<sup>th</sup> MVC ( $-8.7 \pm 8.8\%$ ,  $P = 0.011$ ) at the end of the exercise.

### EMG Activity

ANOVA revealed there to be no significant effect on the  $\text{RMS} \cdot M_{\text{max}}^{-1}$  ratio of the VL muscles nor the BF coactivation level over the entire fatigue protocol. Absolute values are presented in **Table 1**.

### Passive EMG activity and torque

Passive KE torque and VL and BF EMG activity assessed during the SWE measurements remained unchanged during the entire fatigue protocol (**Table 1**).

## Discussion

The aim of this study was to investigate whether the resting  $\mu$ , evaluated by SWE, is a good indicator of peripheral fatigue during the repetition of isometric MVCs of the KE muscles in humans. We hypothesized that a series of isometric MVCs could induce a progressive decline in resting VL $\mu$ , reflecting greater muscle compliance and altered muscle function, and that modifications of resting VL $\mu$  may be directly associated with changes in electrically-stimulated mechanical (single or double pulses) and EMG (M-wave) responses. The main findings were that resting VL $\mu$  significantly decreased during the fatigue protocol from the 10<sup>th</sup> MVC to the end of the exercise (60<sup>th</sup> MVC) for all participants, with the loss ranging from -18 to -29%. The decrease in resting VL $\mu$  was also associated with decreases of voluntary torque, electrically-stimulated mechanical single and double responses, and the 10:100 Hz ratio (low-frequency fatigue). The VL M-wave amplitude was not significantly affected by the fatigue protocol. The kinetics of the resting VL $\mu$  were also associated with changes of the single twitch electromechanical properties. The EMD and CT increased significantly until the end of the exercise and the maximal rate of torque development/relaxation (MRTD and MRTR) were lower than control values. The HRT did not significantly change during the protocol.

## Reproducibility of measurements

SWE has been demonstrated to be a highly promising alternative to conventional elastography techniques, and provides a reliable and quantitative real-time assessment of muscular tissue stiffness at rest and during isometric contractions or passive stretching [21-23]. This study is the first to address the interest of  $\mu$  on a non-contracted muscle at various stages of the fatigue during a series of maximal isometric contractions of the KE muscles. Methodological factors such as

slight probe motion, compression, variability of the measurement, and the ability of subjects to achieve a fully relaxed state need to be meticulously controlled to ensure good reliability of the measurements [46, 47]. There was little variability of the measurements (five images obtained during the 5-s clip) during the entire fatigue protocol. ICC and SEM values varied from 96.7% to 99.5% and from 0.20 kPa to 0.26 kPa for the VL muscle, despite the development of fatigue. We achieved this level of reproducibility by positioning a custom-made probe fixation system over the skin and tightly taping it onto the VL muscle (**Fig 2B**). In addition, the EMG VL and BF EMG activity and passive torque did not change during the SWE recordings (**Table 1**), verifying that the participants were in a relaxed state.

Our resting VL $\mu$  baseline values are concordant with existing published SWE data [29]. The mean and standard deviation of  $8.1 \pm 2.5$  kPa (ranging from 6.0 to 12.3 kPa) for a knee flexion of  $90^\circ$  ( $0^\circ$  = knee fully extended) are in accordance with the values of  $< 10$  kPa for the quadriceps muscles for the same knee flexion ( $90^\circ$ ) in active individuals in a non-fatigued state [29]. However, our control values were higher than those of other studies ( $\sim 3$ -5 kPa) for the VL muscle [22, 46, 48]. These differences may be explained by the short muscle length used in these studies (knee fully extended), as it is known that resting  $\mu$  and muscle stiffness increase with increasing muscle length [27, 29].

## **Muscle stiffness during and immediately after fatiguing exercise**

An understanding of the characteristics of the muscle-tendon complex during and after fatiguing exercise has become essential for the prevention of over-use injuries [49]. Most previous studies have characterized fatigue or training-induced changes in muscle-tendon stiffness by exploring

the movement of human tendons and/or aponeurosis structures *in vivo* [18-20]. Several studies have shown greater muscle-tendon compliance (increases in the elongation of connective structures for the same level of the produced force) after repeated contractions of the KE (e.g., VL muscle) and arm muscles [2, 16, 50]. However, one of the main limitations of these studies is that ultrasound-based techniques reflect modifications in the stiffness of several structures (muscles, tendons, nerves and skin) around a given joint and are not specific to skeletal muscle stiffness.

As mentioned above, SWE provides a quantitative and reliable measurement of individual muscular tissue stiffness [21-23]. A strong linear relationship between individual muscle force and dynamic muscle  $\mu$ , evaluated during contractions, has been demonstrated, suggesting that it may be a good index of individual force [51]. Furthermore, Bouillard *et al.* [30] confirmed this relationship during submaximal isometric contractions, even when muscle fatigue occurs. These results suggest that SWE can be used to quantify relative modifications in voluntary force, even during fatiguing conditions. In another study [31], the same authors showed that when fatigue was previously induced in one quadriceps muscle (VL), lower dynamic  $\mu$  values were observed, both initially and during a subsequent submaximal isometric task, relative to the control non-fatigued muscle. Although the amplitude of the muscle  $\mu$  appears to be affected by fatigue, the underlying mechanisms for its decline are still unknown.

In our study, we observed a progressive decrease in the resting  $\mu$  of the VL muscle from the 10<sup>th</sup> MVC ( $-9.6 \pm 8.5\%$ ) to the end of the fatiguing exercise ( $-21.8 \pm 3.9\%$ ), suggesting a progressive rise in the VL muscle compliance. Some studies have suggested that increases in muscle-tendon compliance can be explained, in part, by alterations of the viscoelastic properties of the intramuscular connective tissue resulting from the increase in muscle temperature, due to



repeated contractions [50, 52]. In our study, it is likely that decreases in the muscle  $\mu$  amplitude were also accompanied by a rise in intramuscular temperature due to repeated maximal isometric contractions. Thus, modifications in the viscoelastic properties of exerted muscles due to fatigue may affect muscle performance. However, the kinetics of muscle temperature during and after the cessation of exercise and its association with the specific viscoelastic properties of muscles is still unknown. Currently, specific viscoelastic properties of the soft tissues may be quantified by real-time supersonic shear imaging, as described in the literature [25, 43], but no study has investigated the effects of peripheral fatigue on the viscoelastic properties of skeletal muscle and its role in force transmission.

The decline of the resting  $\mu$  of the VL muscle found in our study is consistent with those observed for locomotor muscles after strenuous long-distance running, evaluated by invasive techniques, such as tension-myography and muscle belly deformation [24, 53], as well as SWE [22]. This exercise-model is clearly very different from that used in our study and the extent of induced fatigue may be greater than that in our model. For example, Andonian *et al.* [22] observed significant decreases in the resting  $\mu$  of the quadriceps muscles (without distinguishing between the heads, but mainly in the VL muscle) after an extreme mountain ultra-marathon, which were still reduced after more than 45 hours. However, the relationship between changes in muscle  $\mu$  and neuromuscular parameters of fatigue was not explored. In contrast to these results, Akagi *et al.* [54] observed an increase in resting  $\mu$  ( $\sim+7\%$ ) of the *medial gastrocnemius*, but not *soleus* or *lateral gastrocnemius*, muscle using another model of fatiguing exercise (1 h at 10% MVC). Lacourpaille *et al.* [29] showed that intense, non-damaging exercise (3 x 10 concentric MVCs at  $120^\circ\cdot s^{-1}$ ) did not modify the resting  $\mu$  of the elbow flexor muscles. They suggested that the resting  $\mu$  would not be influenced by peripheral factors originating from fatiguing

contractions, contrary to those observed in our study. However, in their study, 30 concentric MVCs did not induce a significant decrease in voluntary torque, limiting the conclusions concerning the relationship between fatigue and changes in resting  $\mu$ . It is possible that in our study the significant decline in resting  $\mu$  during the fatigue protocol may be closely related to the greater observed extent of exercise-induced peripheral fatigue. To date, there is no consensus among studies concerning modifications of muscle stiffness during and after fatiguing exercise. Methodological factors, such as the nature of exercise, duration, intensity, muscle length, morphological parameters of the subjects, and technical aspects, such as limb and probe positioning and the subject relaxation state could explain the discrepancies between studies.

## **Shear elastic modulus and peripheral fatigue outcomes**

The mechanisms underlying changes in muscle  $\mu$  by SWE after fatiguing long-duration exercise are not well described [32]. However, several conclusions have been deduced from modifications in muscle stiffness after damaging exercise. Increases in muscle  $\mu$  have been mainly observed minutes (30 min) and hours (48 h) after eccentric contractions [27, 29]. The authors hypothesized that increases in muscle  $\mu$  may be strongly associated with the rapid perturbation of calcium homeostasis associated with this exercise modality. However, the relationship between the changes in muscle  $\mu$  and cellular perturbations was not explored, limiting therefore conclusions. Moreover, no evaluations were made immediately after exercise in order to determine exercise-induced fatigue effects as propose in the present study.

We found that significant reductions in the KE MVC were mostly explained by alterations of peripheral rather than central factors (loss of  $-8.7 \pm 8.8\%$  VAL at the 60<sup>th</sup> MVC). This is consistent with the literature, showing that high-intensity exercise induces greater peripheral [55]

than central fatigue, which is mainly produced by long-duration exercise [40]. The large extent of peripheral fatigue observed was mostly reflected by a significant decrease in the amplitude of the single- and double-stimulated responses ( $-55.7 \pm 8.8\%$  and  $-42.5 \pm 10.8\%$ , respectively) from the 10<sup>th</sup> MVC to the end of the exercise, but not by an alteration in the potentiated VL M-wave amplitude. Moreover, we observed low-frequency fatigue, *i.e.* the preferential loss of force at low frequencies of electrical stimulation, represented by a progressive decline in the 10:100 Hz ratio by  $22.7 \pm 8.0\%$  by the end of the exercise. Modifications of this ratio are generally associated with changes in excitation-contraction coupling [1, 4, 8-11], more specifically, impairment of calcium homeostasis, *i.e.* decreased  $\text{Ca}^{2+}$  release, reuptake, and sensitivity. It has been hypothesized that increases in resting muscle  $\mu$  following eccentric exercise can be attributed to alterations of calcium homeostasis due to structural disruptions [27, 29]. However, we propose that decreases in resting  $\mu$  in response to fatiguing isometric contractions may be mainly associated with modifications of the elastic properties of the skeletal muscle responsible for force transmission and not by alterations of calcium homeostasis because of the exercise nature differences. The use of SWE at rest appears to be a quantitative and reliable measurement for exploring alterations of peripheral mechanisms during fatiguing contractions. However, the mechanism underlying decreases in resting  $\mu$  under fatiguing conditions need to be investigated.

## **Shear elastic modulus and force transmission properties**

Single twitch properties, such as the EMD, CT, HRT, and their respective first derivatives, the MRTD and MRTR, may also provide information concerning mechanical and electrochemical alterations of skeletal muscle related to force transmission in the fatigued state [12, 13]. For example, the EMD refers to the time between the onset of myoelectrical activity from the conduction of the action potentials along the sarcolemma to the development of tension

originating from the contractile apparatus and stretching of the series of elastic components (electro-chemical and mechanical processes) [14]. EMD is considered to be a good indicator of the elastic properties of muscle, due to the important role played by elongation of the series of elastic components on total EMD [12, 56]. Indeed, it has been demonstrated that the EMD elongate by ~15-20 ms after a fatiguing exercise of KE muscles (25 3-s isometric MVCs), and is associated with a temperature increase [14, 57]. These authors suggested that muscle compliance would increase due to muscular fatigue and the subsequent increase of muscle temperature, resulting in a longer time (a higher EMD) to stretch a more elastic muscle. In our study, the EMD significantly increased by  $21.1 \pm 6.4\%$  (+ 4.5 ms) by the end of the exercise. Moreover, it was related to a significant increase in the CT ( $20.3 \pm 14.5\%$ ) and decrease in the MRTD by  $56.7 \pm 9.0\%$ . The MRTD inversely correlated with overall EMD after fatiguing exercise, in accordance with previous studies [14, 58]. Under fatiguing conditions, a lower MRTD would require more time to transfer tension to the tendon insertion point, thus increasing the EMD. In our study, we suggest that alterations on the electromechanical properties of single twitch may have been mainly associated with elastic rather than electrochemical processes (*e.g.* alteration in the propagation of action potentials along the muscle membrane), due to the lack of modification in the potentiated VL M-wave amplitude during the fatigue protocol. These findings strengthen the relationship between the decline in resting VL $\mu$  and alteration of muscle elastic properties (higher muscle compliance) with fatigue. Studies have suggested that fatigue-induced modification of the viscoelastic properties in the muscle-tendon complex could be strongly associated with a longer EMD (mechanical component) [15, 59]. These assumptions may explain the higher muscle compliance after fatiguing isometric contractions observed in this study. However, modification of the viscoelastic properties of skeletal muscle due to fatigue is yet to be investigated by

supersonic imaging approaches. Thus, in the present study one head of the quadriceps muscle complex was evaluated limiting therefore interpretations about changes of the whole quadriceps neuromuscular properties with fatigue.

Finally, we also found a reduction of  $53.8 \pm 14.7\%$  at the 60<sup>th</sup> MVC in the relaxation phase after muscle contraction (MRTR) with the development of fatigue. It has been suggested that a more compliant elastic component in series requires more time to transmit the decline in cross-bridge tension to the tendon insertion point during relaxation, thus delaying the beginning of force decay [13]. Moreover, it could be related to the decrease in  $\text{Ca}^{2+}$  reuptake by the sarcoplasmic reticulum [60, 61]. Surprisingly, we did not observe any modification in the HRT. This suggests that alterations in the elastic properties of the skeletal muscle may have been mainly present during the development of tension originating from the contractile components and stretching of the elastic component in series rather than cross-bridge detachment. However, the high observed inter-individual variability in HRT values may explain this result.

## Conclusions

This study shows that the kinetics of resting  $\text{VL}\mu$  may be associated with changes in both voluntary and electrostimulated torque responses and electromechanical properties of the single twitch during the repetition of maximal voluntary fatiguing exercise. Changes in resting  $\text{VL}\mu$  may reflect a decline in muscle function, specifically the elastic properties, by increasing muscle compliance, directly affecting the capacity of force transmission. The use of SWE at rest appears to be a viable alternative and parallel tool to classical neuromuscular methods for the exploration of peripheral fatigue. However, the mechanism underlying the decrease in resting  $\mu$  under fatiguing conditions still needs to be investigated.

This study provides scientific evidence related to changes of muscle  $\mu$  associated with greater peripheral fatigue. However, it presents some methodological limitations: (i) the conclusions reported in the present study need be cautiously interpreted due to the small sample ( $n = 8$ ). A more important sample is required in order to determine whether muscles stiffness is varying as a function of strength loss. Then, (ii) in the present study the whole quadriceps complex was not evaluated limiting interpretation of our results concerning others synergist muscles (RF and VM) and their association with the whole quadriceps neuromuscular assessments. Finally, (iii) it is possible that the magnitude of changes in muscle stiffness was different at other muscle lengths. Indeed, it has been suggested that muscle stiffness may vary as a function of muscle anatomical configuration (biarticular or monoarticular) [62] and muscle length (short or long) [27]. However, these findings were reported after eccentric but not fatiguing exercise. Thus, the relationship between muscle fatigue, stiffness and muscle length need therefore to be more investigated.

The SWE technique provides a non-invasive, quantitative, and reliable measurement of individual muscle tissue stiffness during fatiguing conditions. The study of both the muscle and tendon characteristics during and after fatiguing exercises in the context of sports medicine or the military is essential for the prevention of over-use injuries resulting from repeated exposure to low or high levels of force. More studies are required to confirm the observed higher specific muscle compliance with fatigue and its direct relationship with modifications of the stiffness of other non-contractile structures by ultrasound. Moreover, the *in vivo* analysis of the viscoelastic properties of skeletal muscle by supersonic imaging is necessary to better understand modifications in stiffness after fatiguing exercise and its impact on muscle performance.

## Acknowledgements

We thank Stéphane BAUGE, Stéphanie BOURDON, Philippe COLIN, and Benoit LEPETIT for their technical support and Pierre DEMAN for his contributions to SWE signal treatment. We also thank Oliver NESPOULOUS, MD. for his medical support.

## References

1. Gandevia SC. Spinal and supraspinal factors in human muscle fatigue. *Physiological reviews*. 2001;81:1725-89.
2. Kubo K, Kanehisa H, Kawakami Y, Fukunaga T. Effects of repeated muscle contractions on the tendon structures in humans. *Eur J Appl Physiol*. 2001;84:162-6.
3. Carroll TJ, Taylor JL, Gandevia SC. Recovery of central and peripheral neuromuscular fatigue after exercise. *J Appl Physiol (1985)*. 2017;122:1068-76.
4. Enoka RM, Stuart DG. Neurobiology of muscle fatigue. *Journal of applied physiology*. 1992;72:1631-48.
5. Garcia-Vicencio S, Coudeyre E, Kluka V, Cardenoux C, Jegu AG, Fourot AV, et al. The bigger, the stronger? Insights from muscle architecture and nervous characteristics in obese adolescent girls. *International journal of obesity*. 2016;40:245-51.
6. Maffiuletti NA, Gondin J, Place N, Stevens-Lapsley J, Vivodtzev I, Minetto MA. Clinical Use of Neuromuscular Electrical Stimulation for Neuromuscular Rehabilitation: What Are We Overlooking? *Archives of physical medicine and rehabilitation*. 2017.
7. Martin V, Kerherve H, Messonnier LA, Banfi JC, Geysant A, Bonnefoy R, et al. Central and peripheral contributions to neuromuscular fatigue induced by a 24-h treadmill run. *J Appl Physiol (1985)*. 2010;108:1224-33.
8. Edwards RH. Human muscle function and fatigue. *Ciba Foundation symposium*. 1981;82:1-18.



9. Bigland-Ritchie B. EMG and fatigue of human voluntary and stimulated contractions. Ciba Foundation symposium. 1981;82:130-56.
10. Millet GY, Bachasson D, Temesi J, Wuyam B, Feasson L, Verges S, et al. Potential interests and limits of magnetic and electrical stimulation techniques to assess neuromuscular fatigue. *Neuromuscular disorders : NMD*. 2012;22 Suppl 3:S181-6.
11. Debold EP. Recent insights into muscle fatigue at the cross-bridge level. *Frontiers in physiology*. 2012;3:151.
12. Ce E, Rampichini S, Agnello L, Limonta E, Veicsteinas A, Esposito F. Effects of temperature and fatigue on the electromechanical delay components. *Muscle Nerve*. 2013;47:566-76.
13. Ce E, Rampichini S, Venturelli M, Limonta E, Veicsteinas A, Esposito F. Electromechanical delay components during relaxation after voluntary contraction: reliability and effects of fatigue. *Muscle Nerve*. 2015;51:907-15.
14. Zhou S, Carey MF, Snow RJ, Lawson DL, Morrison WE. Effects of muscle fatigue and temperature on electromechanical delay. *Electromyography and clinical neurophysiology*. 1998;38:67-73.
15. Zhang LQ, Rymer WZ. Reflex and intrinsic changes induced by fatigue of human elbow extensor muscles. *Journal of neurophysiology*. 2001;86:1086-94.
16. Kubo K, Kanehisa H, Kawakami Y, Fukunaga T. Influences of repetitive muscle contractions with different modes on tendon elasticity in vivo. *J Appl Physiol* (1985). 2001;91:277-82.

17. Kubo K, Kanehisa H, Fukunaga T. Influences of repetitive drop jump and isometric leg press exercises on tendon properties in knee extensors. *J Strength Cond Res.* 2005;19:864-70.
18. Kubo K, Kanehisa H, Kawakami Y, Fukunaga T. Elastic properties of muscle-tendon complex in long-distance runners. *Eur J Appl Physiol.* 2000;81:181-7.
19. Bojsen-Moller J, Hansen P, Aagaard P, Kjaer M, Magnusson SP. Measuring mechanical properties of the vastus lateralis tendon-aponeurosis complex in vivo by ultrasound imaging. *Scand J Med Sci Sports.* 2003;13:259-65.
20. Fukashiro S, Itoh M, Ichinose Y, Kawakami Y, Fukunaga T. Ultrasonography gives directly but noninvasively elastic characteristic of human tendon in vivo. *Eur J Appl Physiol Occup Physiol.* 1995;71:555-7.
21. Brandenburg JE, Eby SF, Song P, Zhao H, Brault JS, Chen S, et al. Ultrasound elastography: the new frontier in direct measurement of muscle stiffness. *Archives of physical medicine and rehabilitation.* 2014;95:2207-19.
22. Andonian P, Viallon M, Le Goff C, de Bourguignon C, Tourel C, Morel J, et al. Shear-Wave Elastography Assessments of Quadriceps Stiffness Changes prior to, during and after Prolonged Exercise: A Longitudinal Study during an Extreme Mountain Ultra-Marathon. *PLoS One.* 2016;11:e0161855.
23. Lacourpaille L, Hug F, Guevel A, Pereon Y, Magot A, Hogrel JY, et al. Non-invasive assessment of muscle stiffness in patients with Duchenne muscular dystrophy. *Muscle Nerve.* 2015;51:284-6.

24. Garcia-Manso JM, Rodriguez-Ruiz D, Rodriguez-Matoso D, de Saa Y, Sarmiento S, Quiroga M. Assessment of muscle fatigue after an ultra-endurance triathlon using tensiomyography (TMG). *J Sports Sci.* 2011;29:619-25.
25. Bercoff J, Tanter M, Fink M. Supersonic shear imaging: a new technique for soft tissue elasticity mapping. *IEEE transactions on ultrasonics, ferroelectrics, and frequency control.* 2004;51:396-409.
26. Catheline S, Gennisson JL, Delon G, Fink M, Sinkus R, Abouelkaram S, et al. Measuring of viscoelastic properties of homogeneous soft solid using transient elastography: an inverse problem approach. *The Journal of the Acoustical Society of America.* 2004;116:3734-41.
27. Lacourpaille L, Nordez A, Hug F, Couturier A, Dibie C, Guilhem G. Time-course effect of exercise-induced muscle damage on localized muscle mechanical properties assessed using elastography. *Acta Physiol (Oxf).* 2014;211:135-46.
28. Guilhem G, Doguet V, Hauraix H, Lacourpaille L, Jubeau M, Nordez A, et al. Muscle force loss and soreness subsequent to maximal eccentric contractions depend on the amount of fascicle strain in vivo. *Acta Physiol (Oxf).* 2016;217:152-63.
29. Lacourpaille L, Nordez A, Hug F, Doguet V, Andrade R, Guilhem G. Early detection of exercise-induced muscle damage using elastography. *Eur J Appl Physiol.* 2017.
30. Bouillard K, Hug F, Guevel A, Nordez A. Shear elastic modulus can be used to estimate an index of individual muscle force during a submaximal isometric fatiguing contraction. *J Appl Physiol (1985).* 2012;113:1353-61.

31. Bouillard K, Jubeau M, Nordez A, Hug F. Effect of vastus lateralis fatigue on load sharing between quadriceps femoris muscles during isometric knee extensions. *Journal of neurophysiology*. 2014;111:768-76.
32. Andonian P, Viallon M, Le Goff C, de Bourguignon C, Tourel C, Morel J, et al. Correction: Shear-Wave Elastography Assessments of Quadriceps Stiffness Changes prior to, during and after Prolonged Exercise: A Longitudinal Study during an Extreme Mountain Ultra-Marathon. *PLoS One*. 2016;11:e0167668.
33. Jones DA, Newham DJ, Torgan C. Mechanical influences on long-lasting human muscle fatigue and delayed-onset pain. *J Physiol*. 1989;412:415-27.
34. Ratel S, Kluka V, Vicencio SG, Jegu AG, Cardenoux C, Morio C, et al. Insights into the Mechanisms of Neuromuscular Fatigue in Boys and Men. *Med Sci Sports Exerc*. 2015;47:2319-28.
35. Schuklenk U. Helsinki Declaration revisions. *Issues in medical ethics*. 2001;9:29.
36. Durnin JV, Womersley J. Body fat assessed from total body density and its estimation from skinfold thickness: measurements on 481 men and women aged from 16 to 72 years. *Br J Nutr*. 1974;32:77-97.
37. Merton PA. Voluntary strength and fatigue. *J Physiol*. 1954;123:553-64.
38. Kufel TJ, Pineda LA, Mador MJ. Comparison of potentiated and unpotentiated twitches as an index of muscle fatigue. *Muscle Nerve*. 2002;25:438-44.
39. Gandevia SC, McKenzie DK. Activation of human muscles at short muscle lengths during maximal static efforts. *J Physiol*. 1988;407:599-613.

40. Millet GY, Lepers R, Maffiuletti NA, Babault N, Martin V, Lattier G. Alterations of neuromuscular function after an ultramarathon. *Journal of applied physiology*. 2002;92:486-92.
41. Verges S, Maffiuletti NA, Kerherve H, Decorte N, Wuyam B, Millet GY. Comparison of electrical and magnetic stimulations to assess quadriceps muscle function. *J Appl Physiol* (1985). 2009;106:701-10.
42. Hermens HJ, Freriks B, Disselhorst-Klug C, Rau G. Development of recommendations for SEMG sensors and sensor placement procedures. *J Electromyogr Kinesiol*. 2000;10:361-74.
43. Gennisson JL, Deffieux T, Mace E, Montaldo G, Fink M, Tanter M. Viscoelastic and anisotropic mechanical properties of in vivo muscle tissue assessed by supersonic shear imaging. *Ultrasound in medicine & biology*. 2010;36:789-801.
44. Royer D, Gennisson JL, Deffieux T, Tanter M. On the elasticity of transverse isotropic soft tissues (L). *The Journal of the Acoustical Society of America*. 2011;129:2757-60.
45. Hopkins WG. Measures of reliability in sports medicine and science. *Sports Med*. 2000;30:1-15.
46. Lacourpaille L, Hug F, Bouillard K, Hogrel JY, Nordez A. Supersonic shear imaging provides a reliable measurement of resting muscle shear elastic modulus. *Physiological measurement*. 2012;33:N19-28.
47. Eby SF, Song P, Chen S, Chen Q, Greenleaf JF, An KN. Validation of shear wave elastography in skeletal muscle. *Journal of biomechanics*. 2013;46:2381-7.
48. Botanlioglu H, Kantarci F, Kaynak G, Unal Y, Ertan S, Aydingoz O, et al. Shear wave elastography properties of vastus lateralis and vastus medialis obliquus muscles in normal

subjects and female patients with patellofemoral pain syndrome. *Skeletal radiology*.

2013;42:659-66.

49. Kvist M. Achilles tendon injuries in athletes. *Sports Med*. 1994;18:173-201.

50. Vigreux B, Cnockaert JC, Pertuzon E. Effects of fatigue on the series elastic component of human muscle. *Eur J Appl Physiol Occup Physiol*. 1980;45:11-7.

51. Bouillard K, Nordez A, Hug F. Estimation of individual muscle force using elastography. *PLoS One*. 2011;6:e29261.

52. Warren CG, Lehmann JF, Koblanski JN. Elongation of rat tail tendon: effect of load and temperature. *Archives of physical medicine and rehabilitation*. 1971;52:465-74 passim.

53. Giovanelli N, Taboga P, Rejc E, Simunic B, Antonutto G, Lazzer S. Effects of an Uphill Marathon on Running Mechanics and Lower-Limb Muscle Fatigue. *International journal of sports physiology and performance*. 2016;11:522-9.

54. Akagi R, Fukui T, Kubota M, Nakamura M, Ema R. Muscle Shear Moduli Changes and Frequency of Alternate Muscle Activity of Plantar Flexor Synergists Induced by Prolonged Low-Level Contraction. *Frontiers in physiology*. 2017;8:708.

55. Lattier G, Millet GY, Martin A, Martin V. Fatigue and recovery after high-intensity exercise part I: neuromuscular fatigue. *International journal of sports medicine*. 2004;25:450-6.

56. Cavanagh PR, Komi PV. Electromechanical delay in human skeletal muscle under concentric and eccentric contractions. *Eur J Appl Physiol Occup Physiol*. 1979;42:159-63.

57. Zhou S. Acute effect of repeated maximal isometric contraction on electromechanical delay of knee extensor muscle. *J Electromyogr Kinesiol*. 1996;6:117-27.

58. Zhou S, Lawson DL, Morrison WE, Fairweather I. Electromechanical delay in isometric muscle contractions evoked by voluntary, reflex and electrical stimulation. *Eur J Appl Physiol Occup Physiol.* 1995;70:138-45.
59. Taylor DC, Brooks DE, Ryan JB. Viscoelastic characteristics of muscle: passive stretching versus muscular contractions. *Med Sci Sports Exerc.* 1997;29:1619-24.
60. Ce E, Rampichini S, Limonta E, Esposito F. Fatigue effects on the electromechanical delay components during the relaxation phase after isometric contraction. *Acta Physiol (Oxf).* 2014;211:82-96.
61. Fitts RH. The cross-bridge cycle and skeletal muscle fatigue. *J Appl Physiol* (1985). 2008;104:551-8.
62. Heales LJ, Badya R, Ziegenfuss B, Hug F, Coombes JS, van den Hoorn W, et al. Shear-wave velocity of the patellar tendon and quadriceps muscle is increased immediately after maximal eccentric exercise. *European journal of applied physiology.* 2018;118:1715-24.

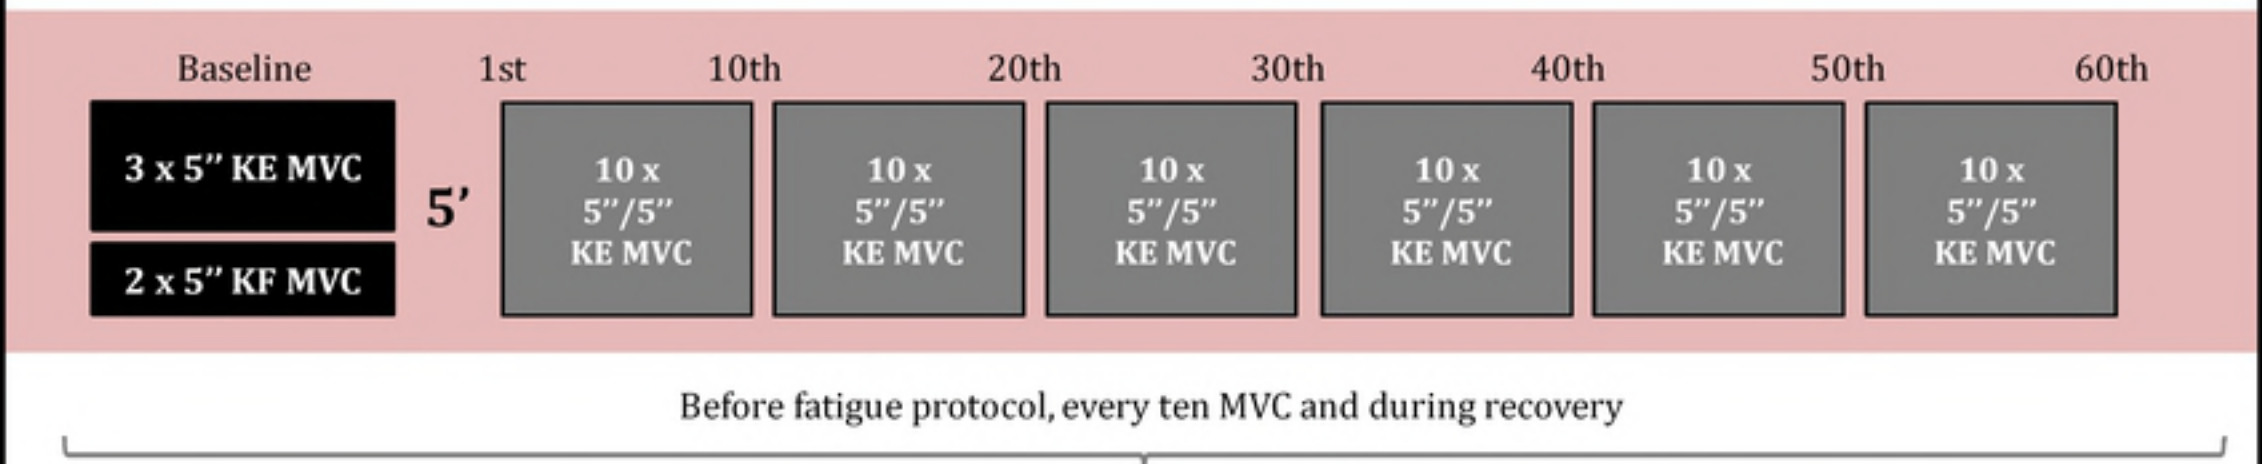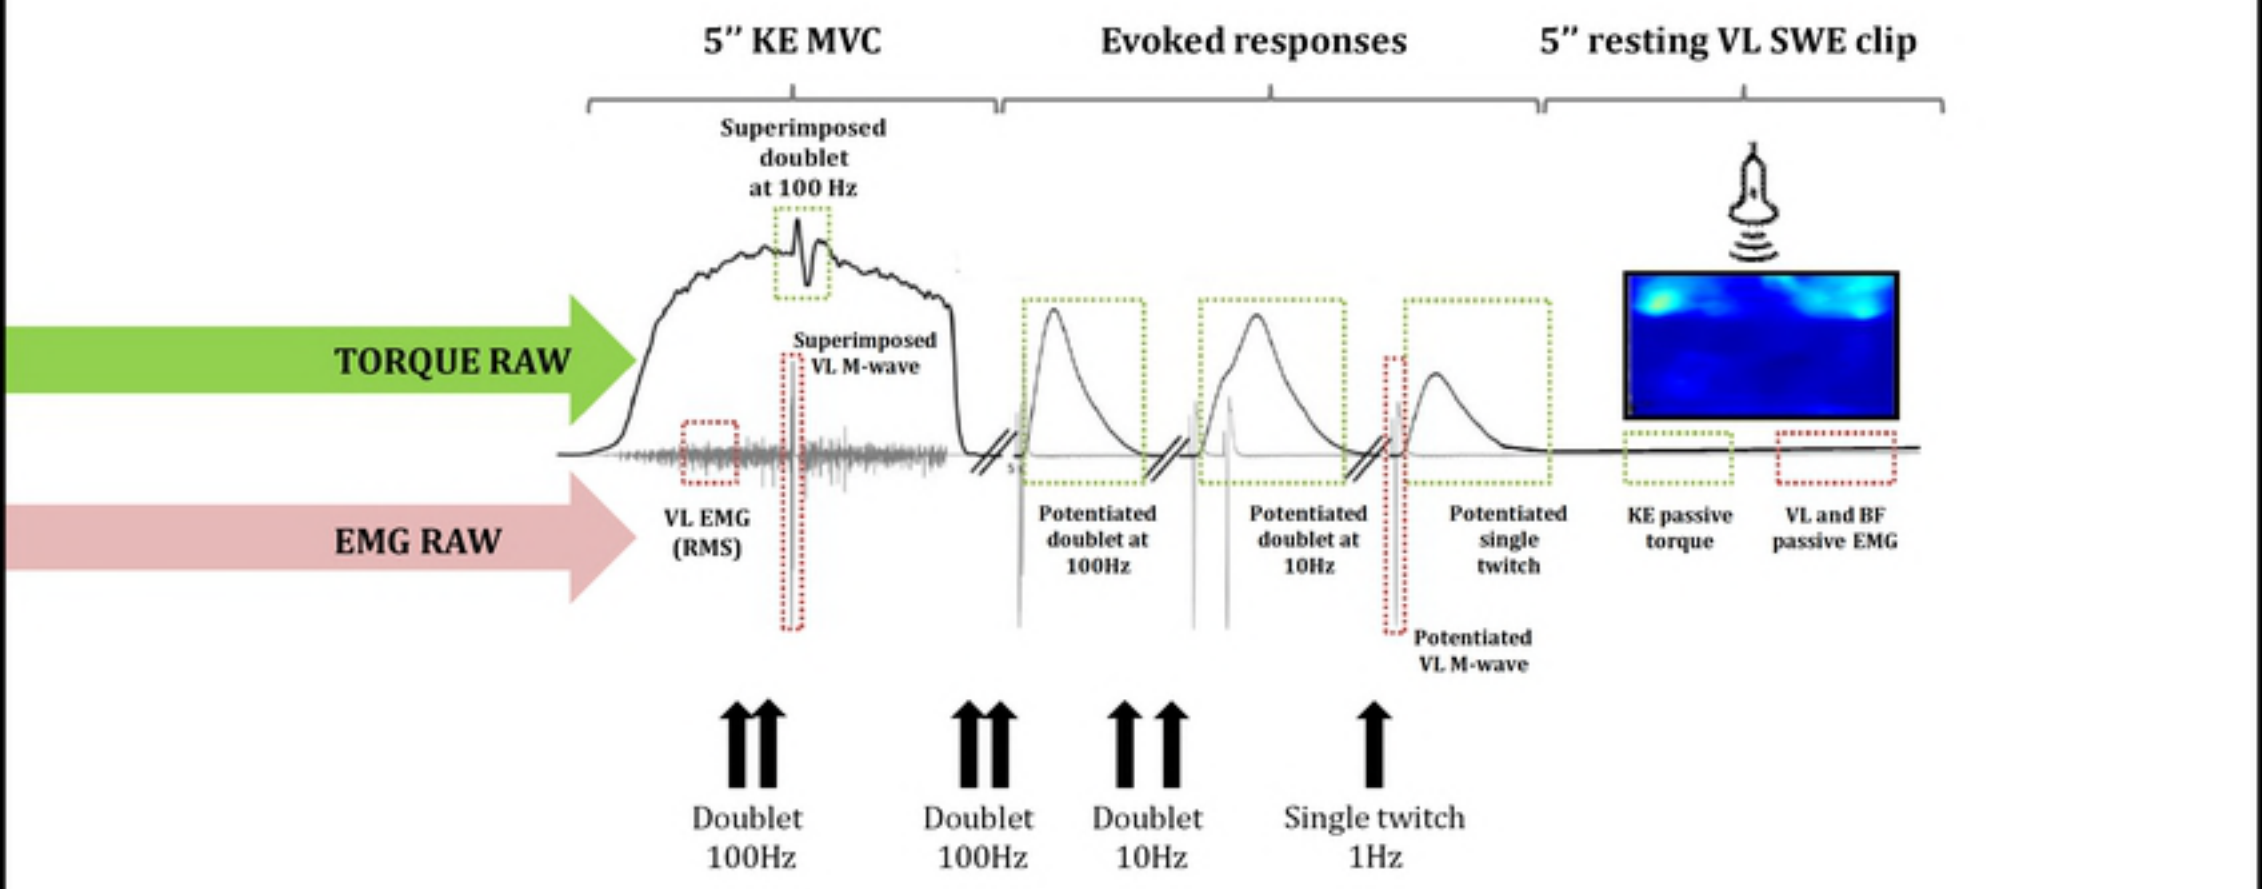



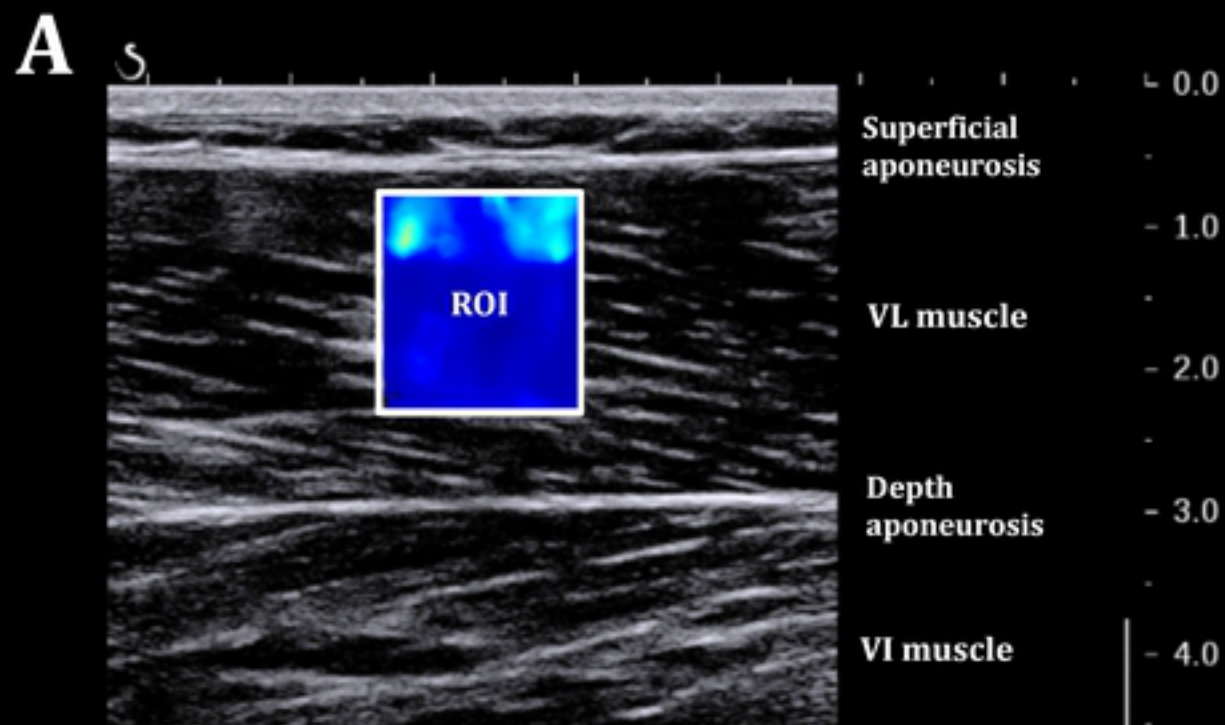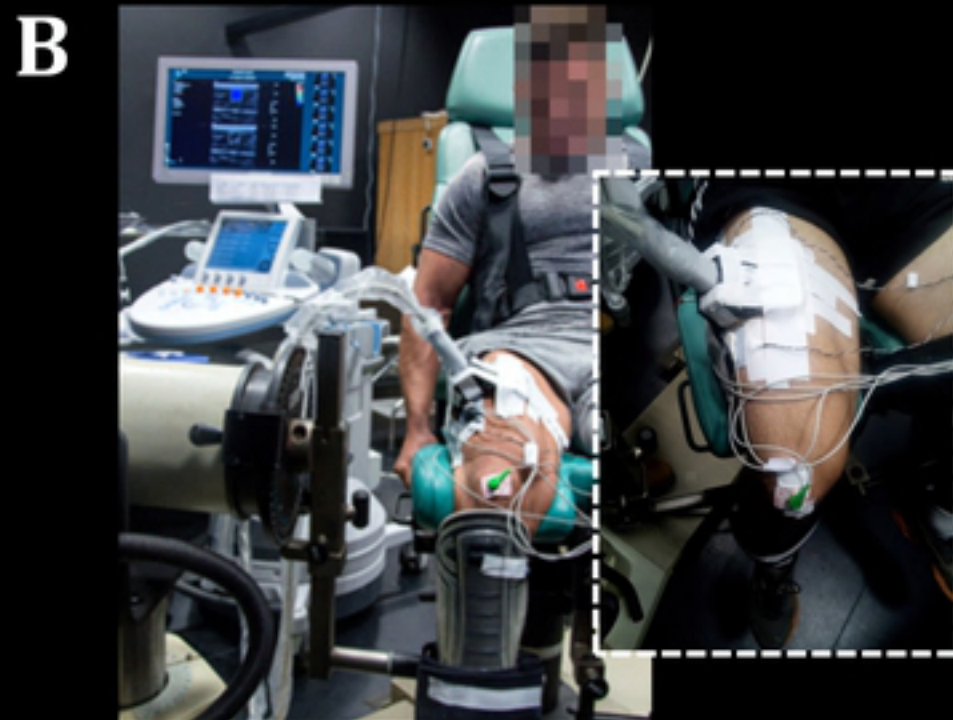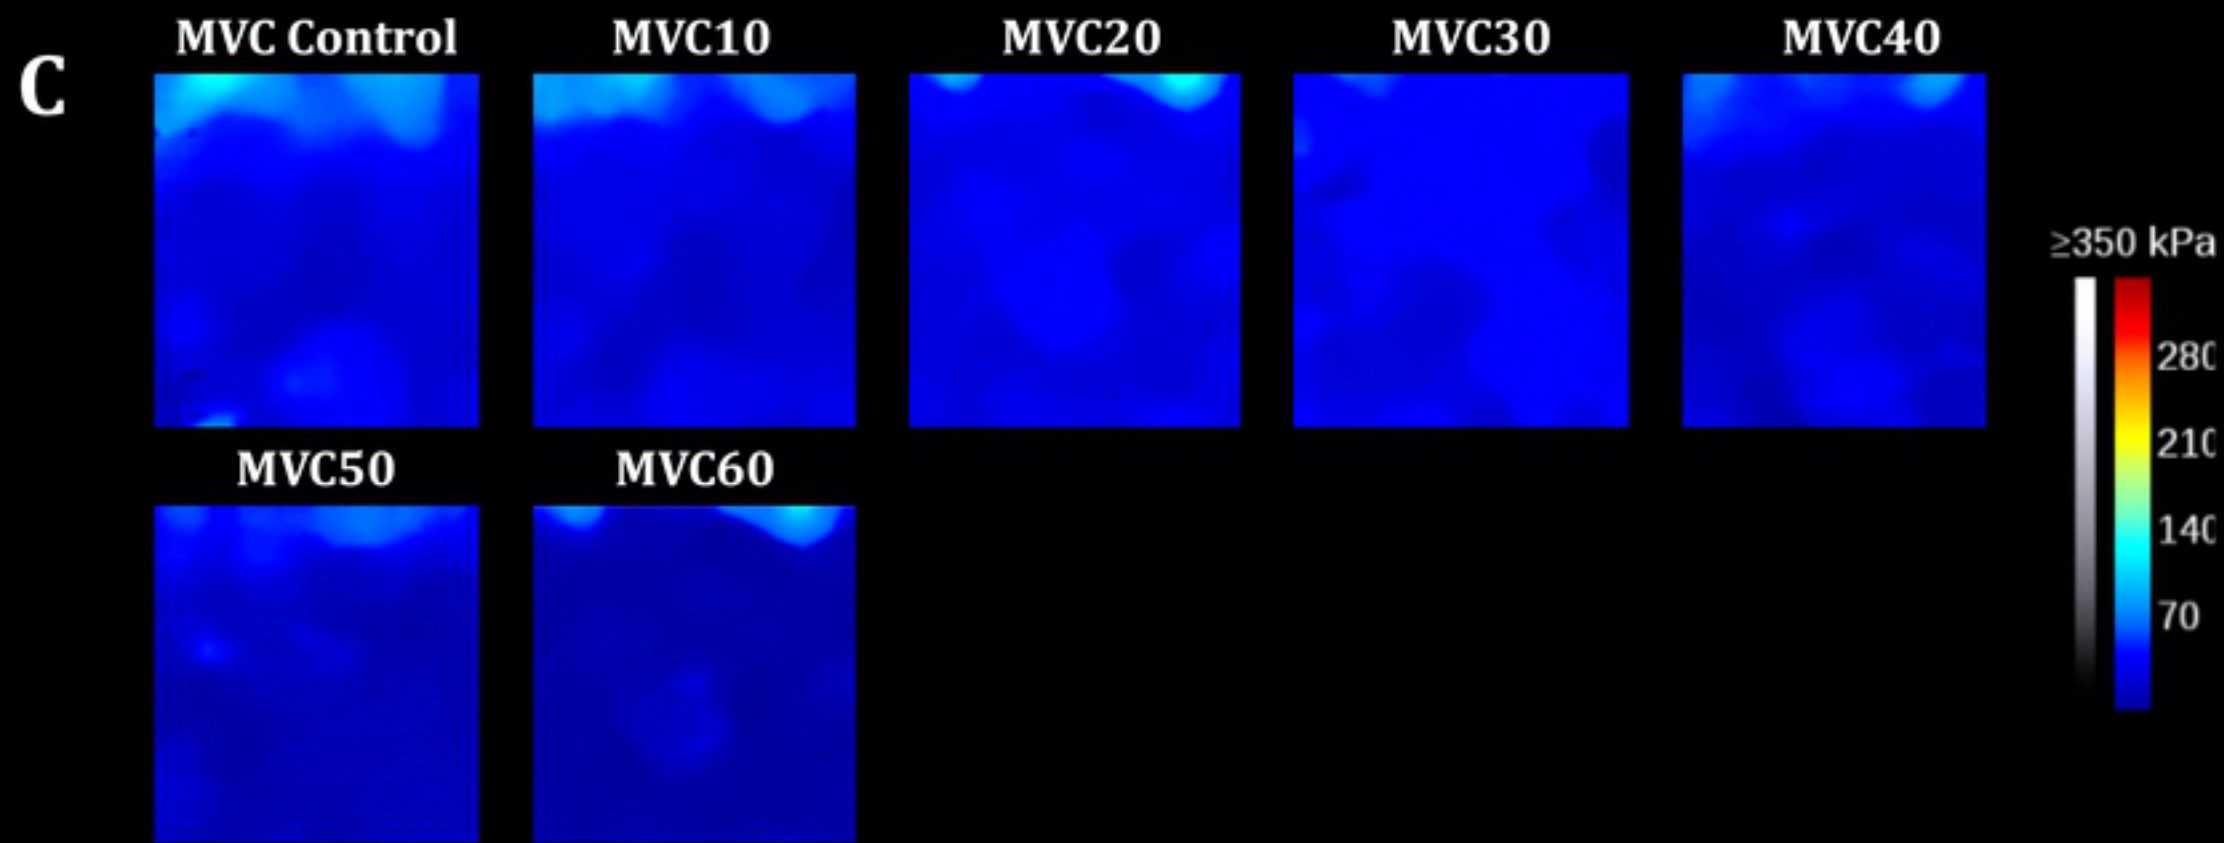

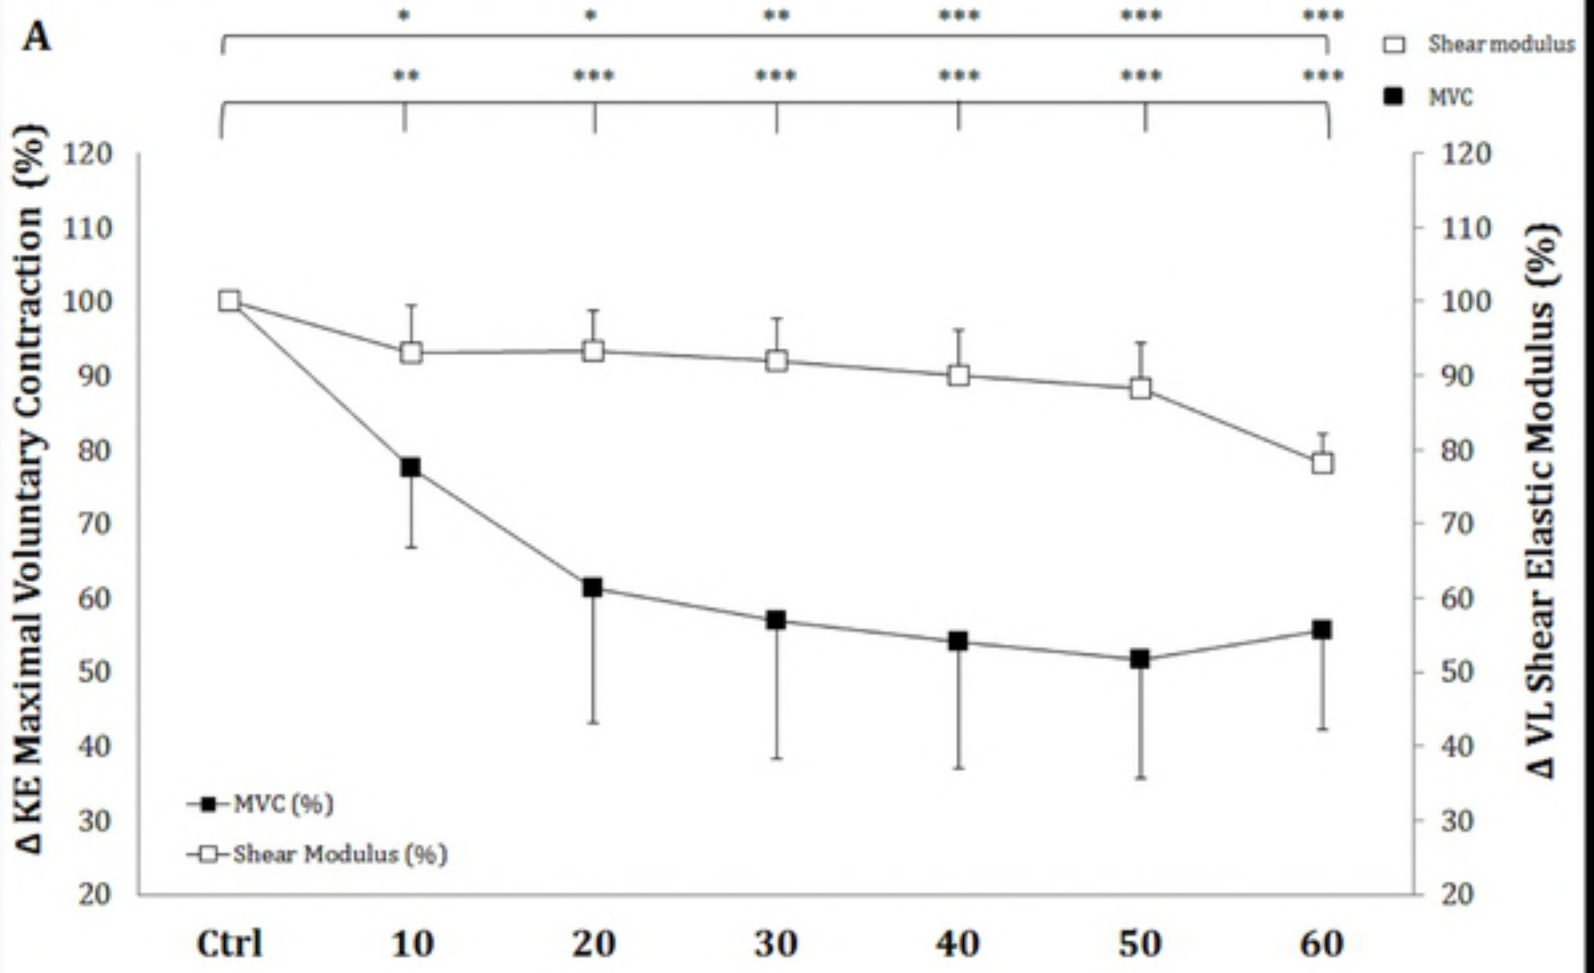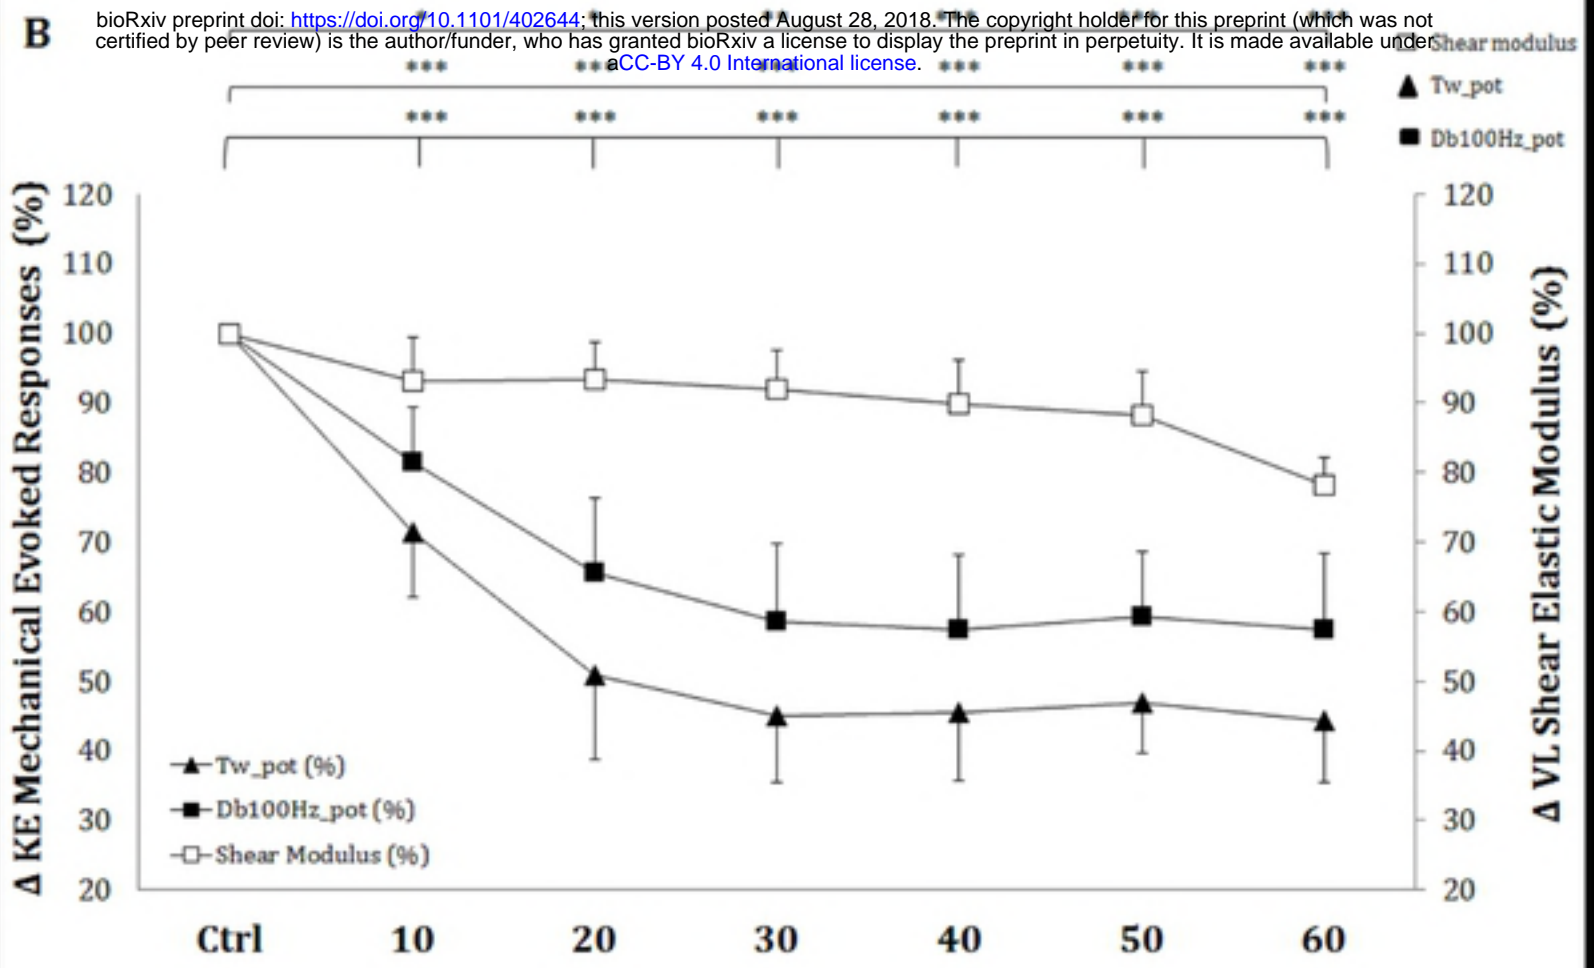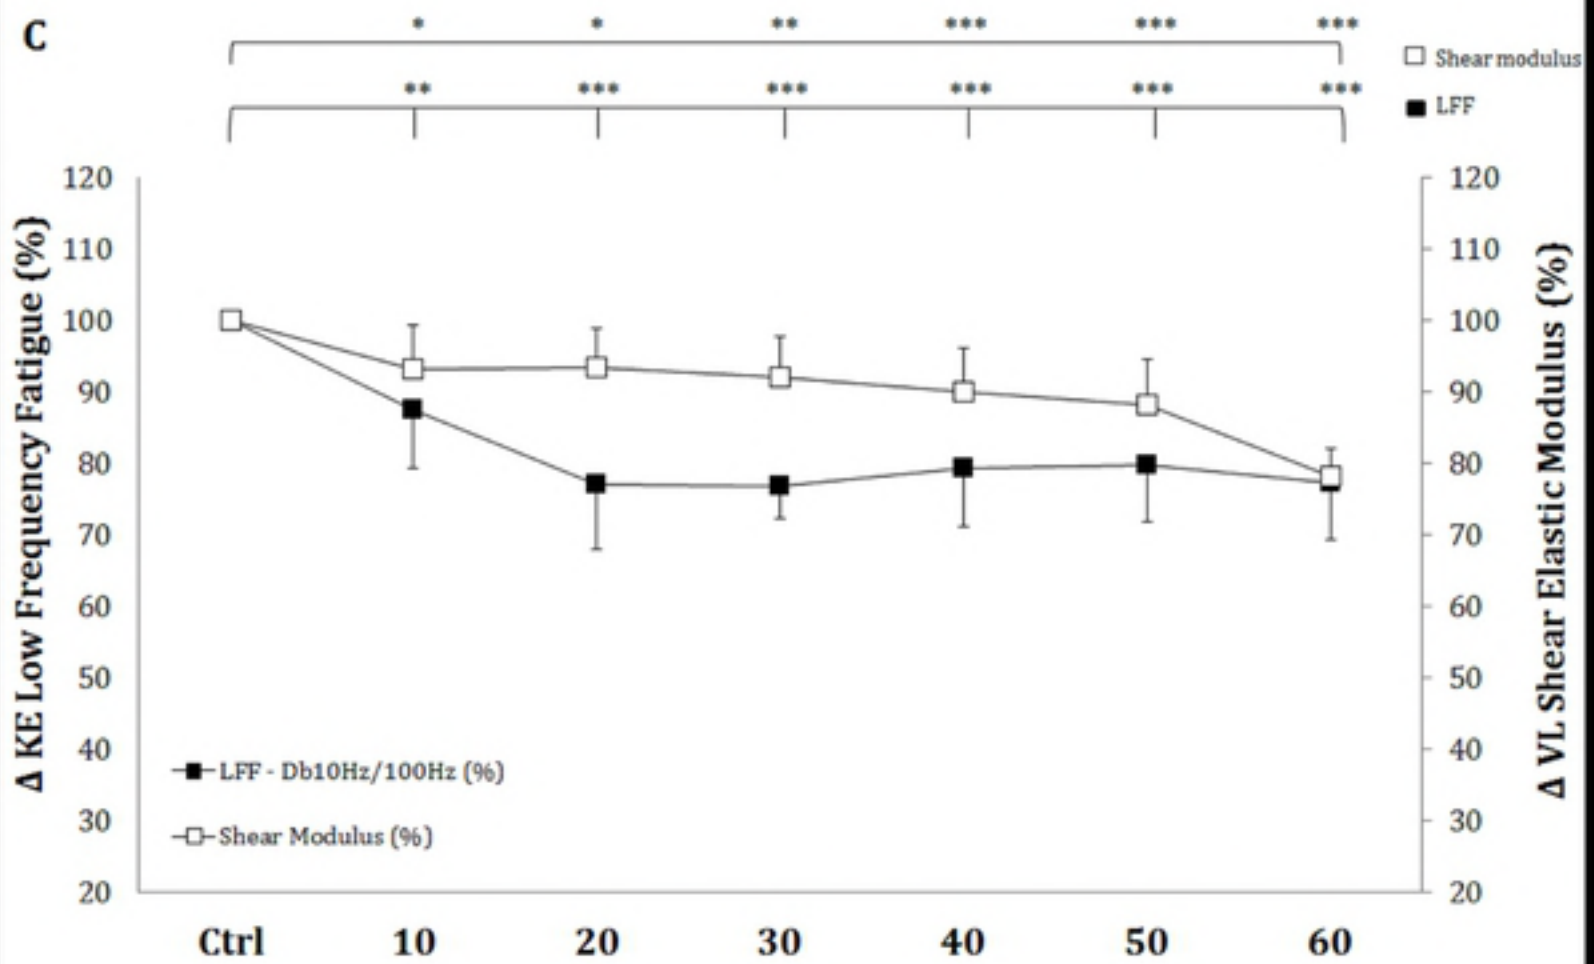

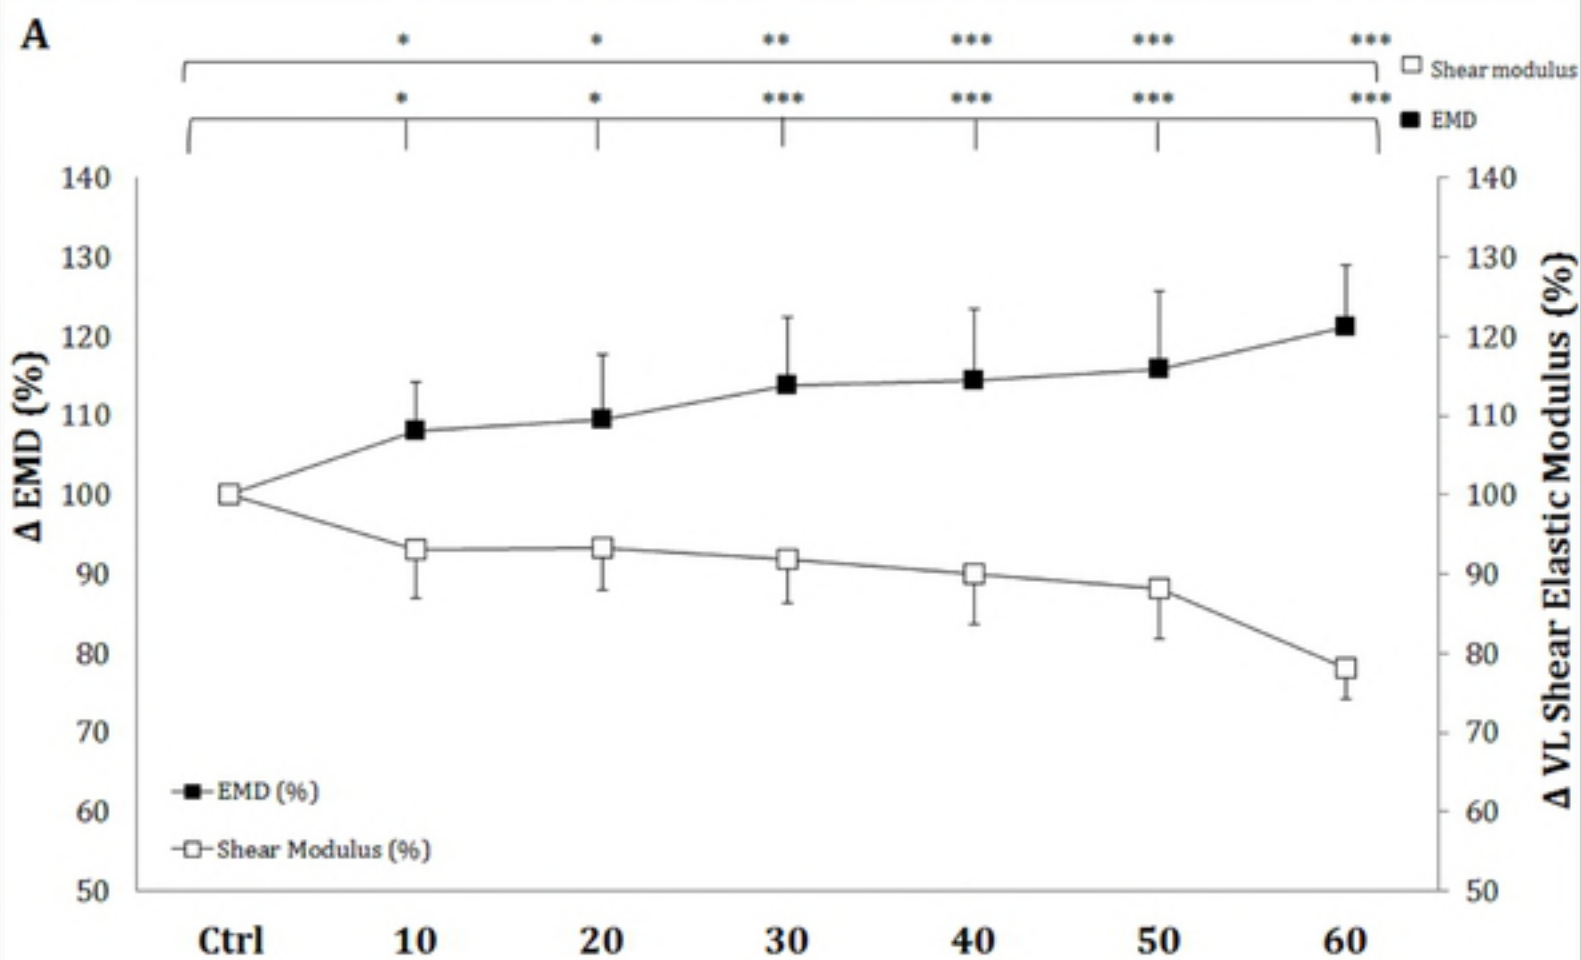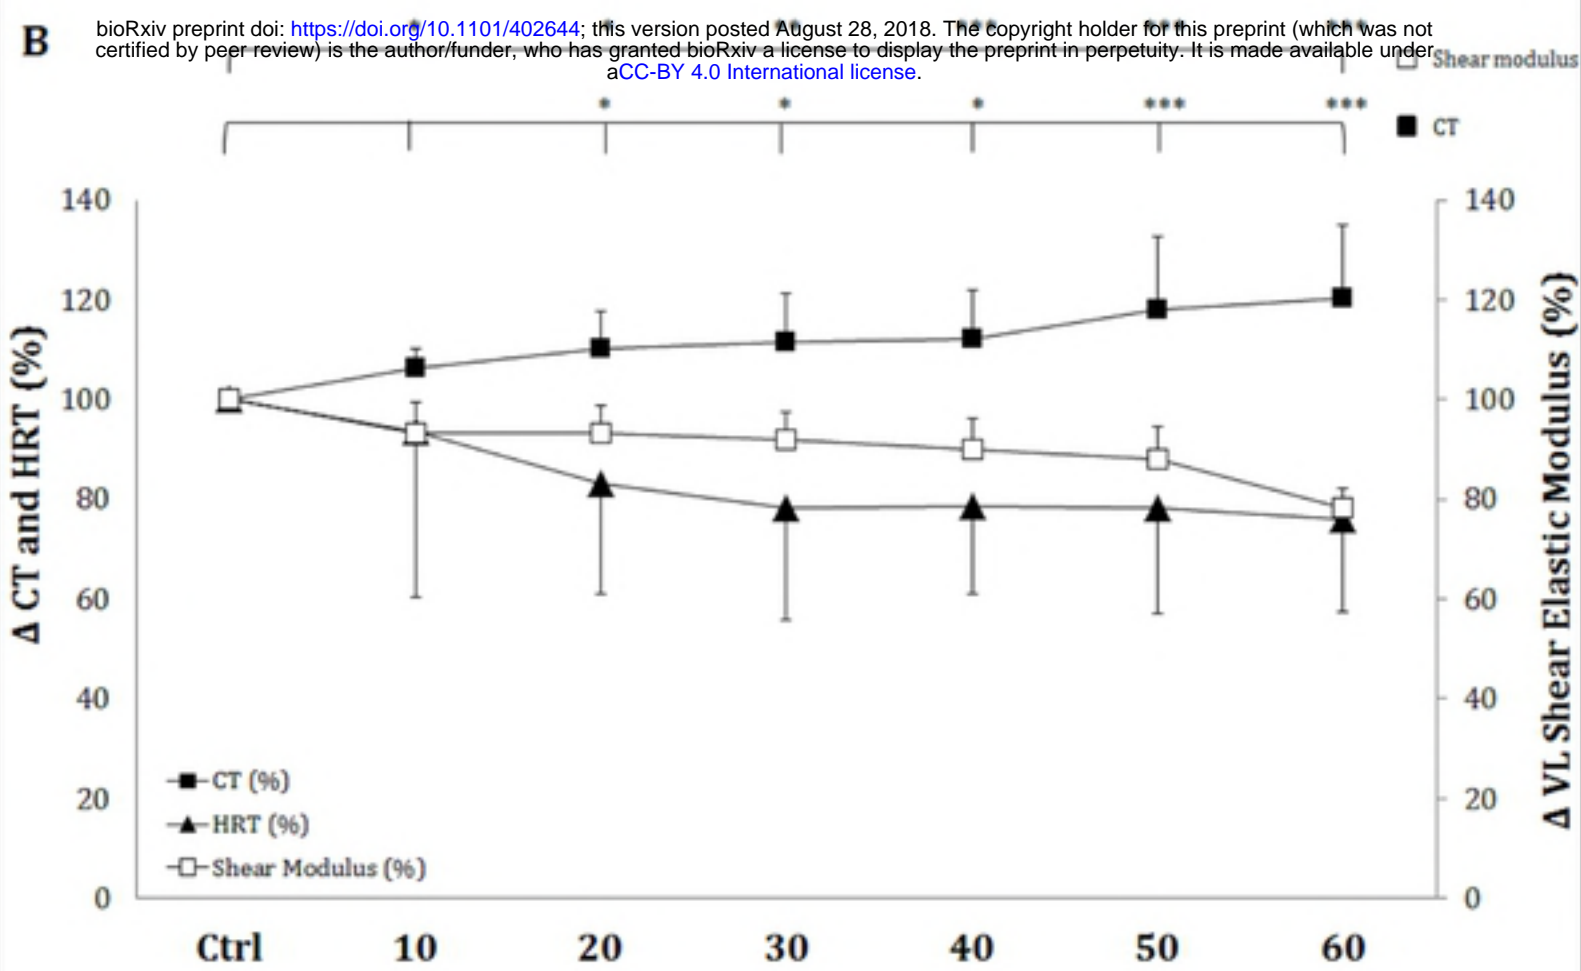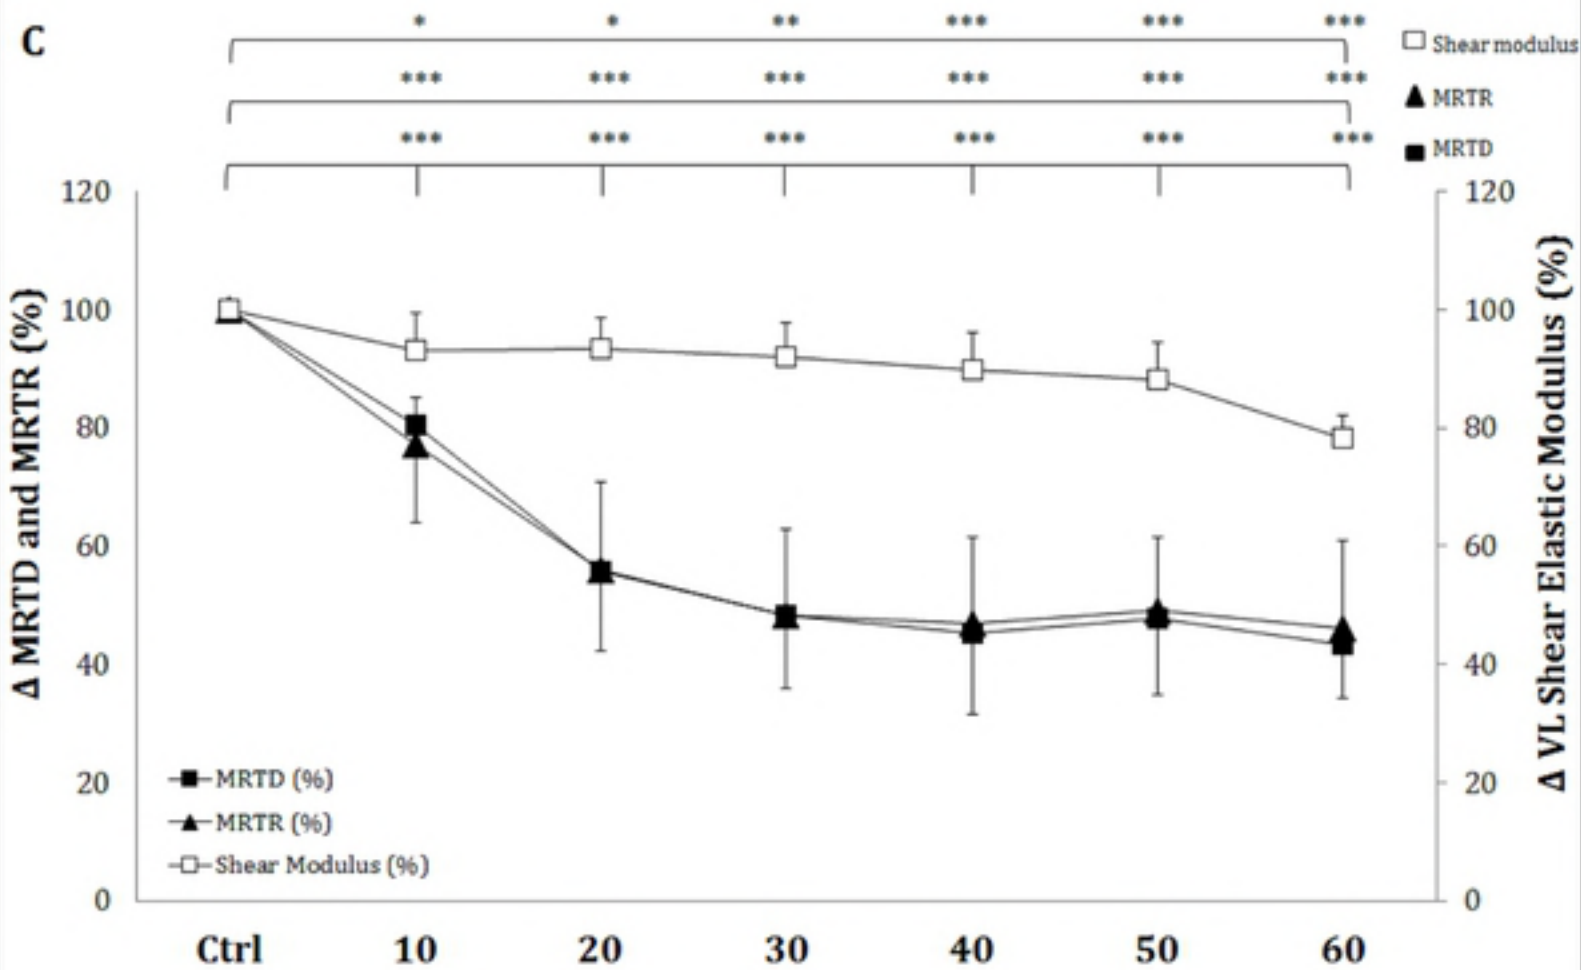

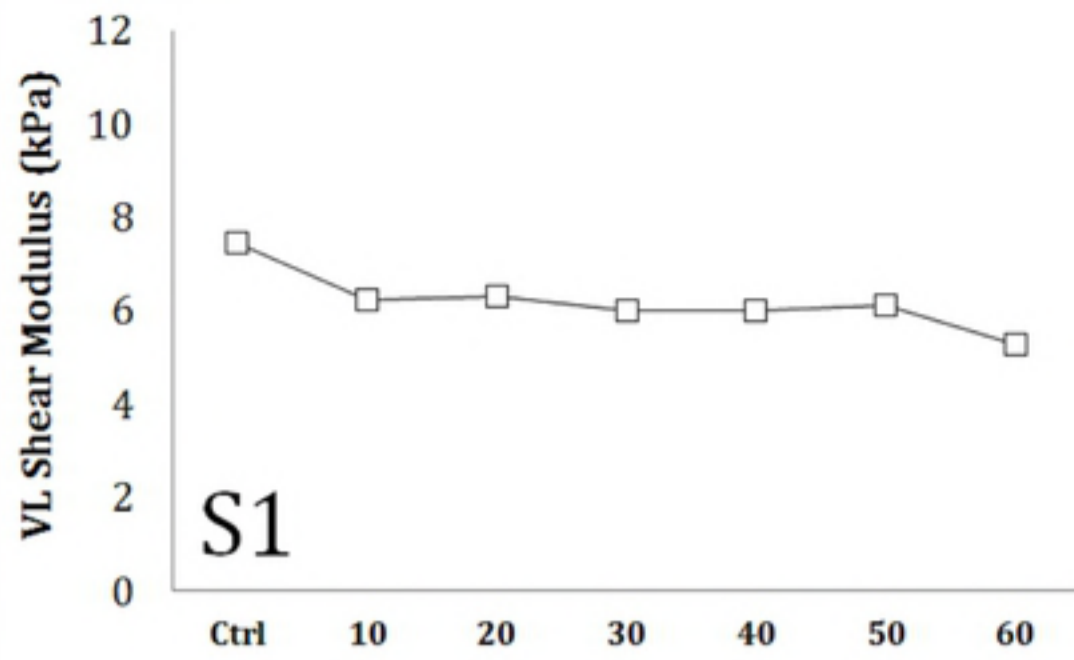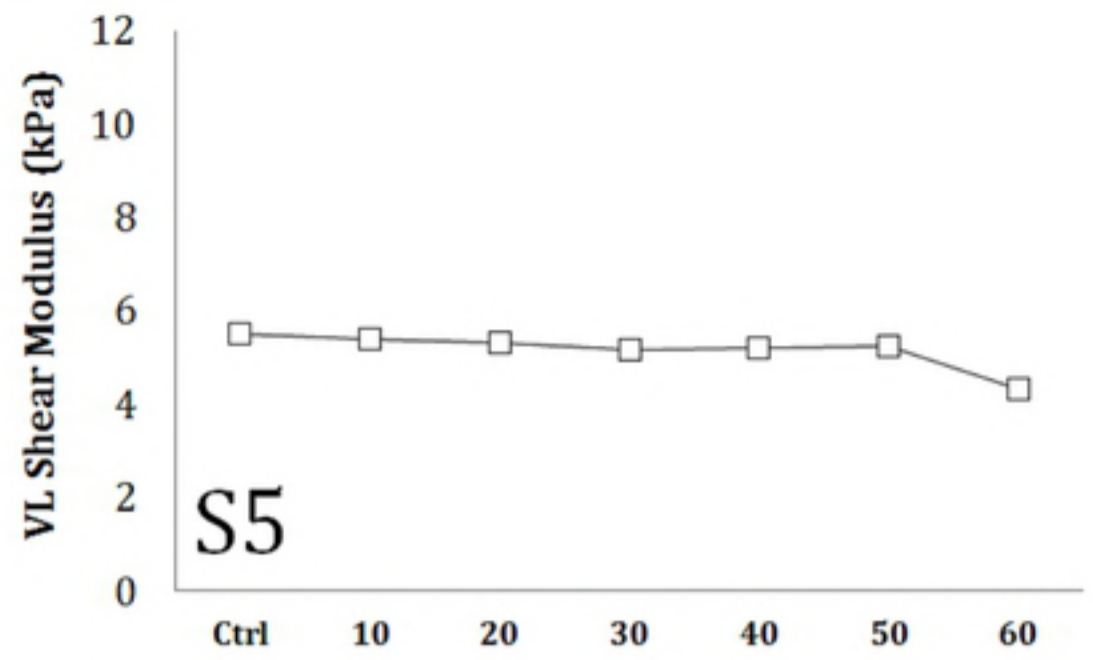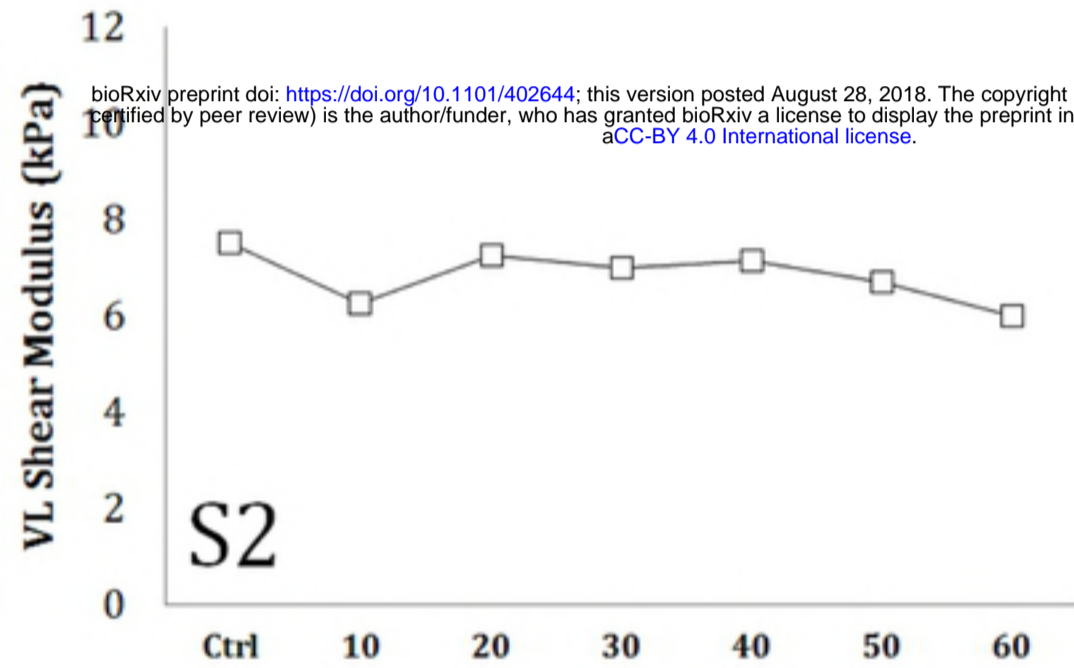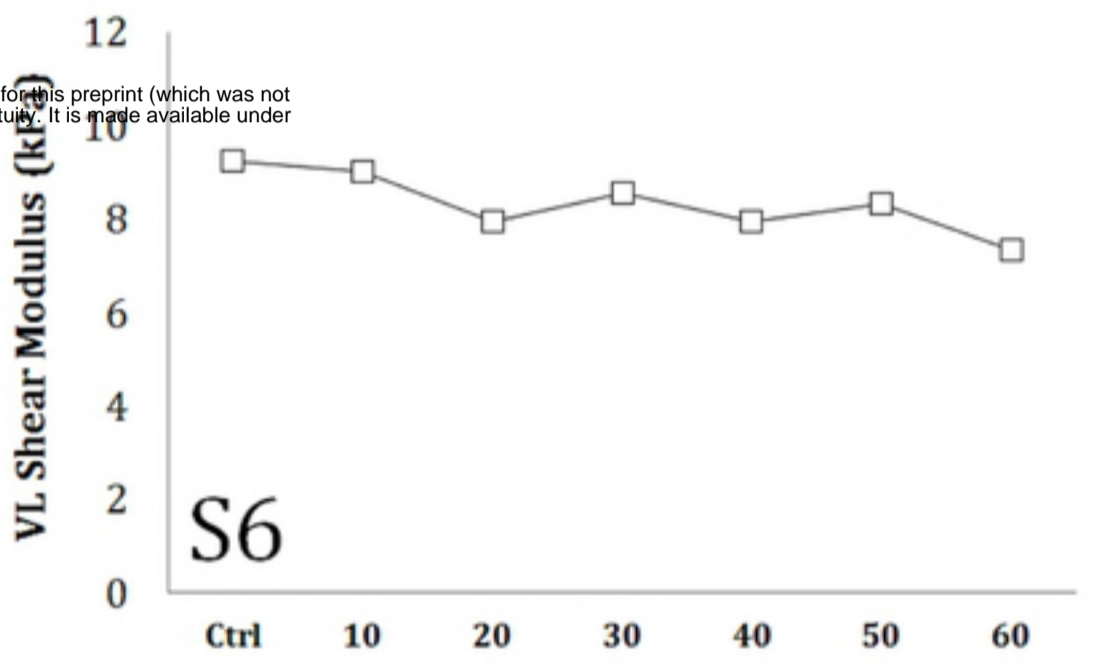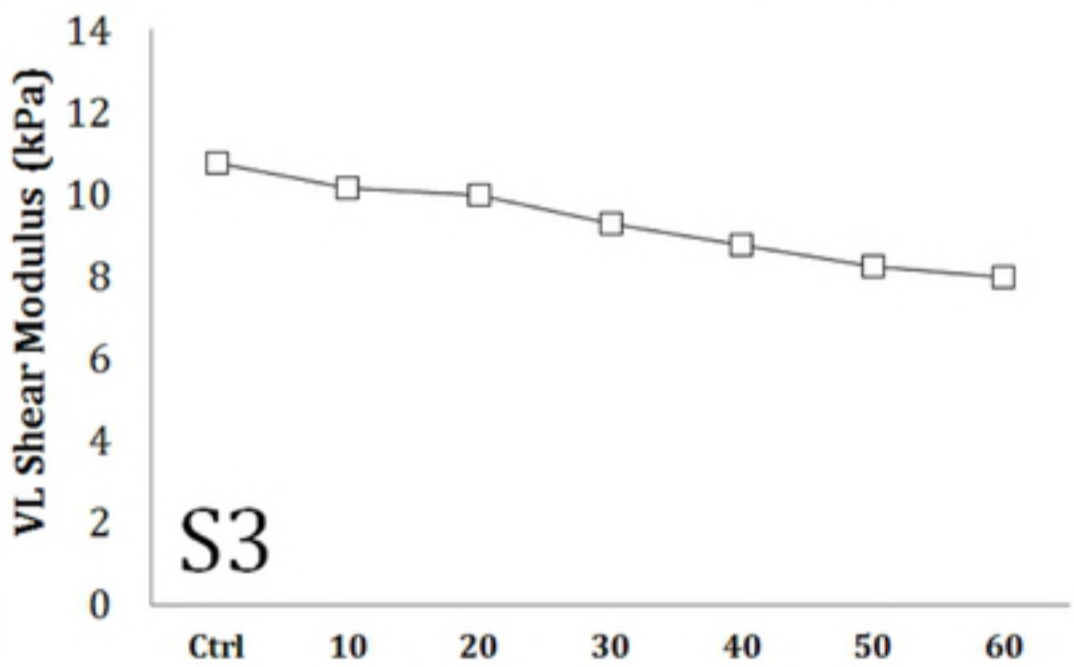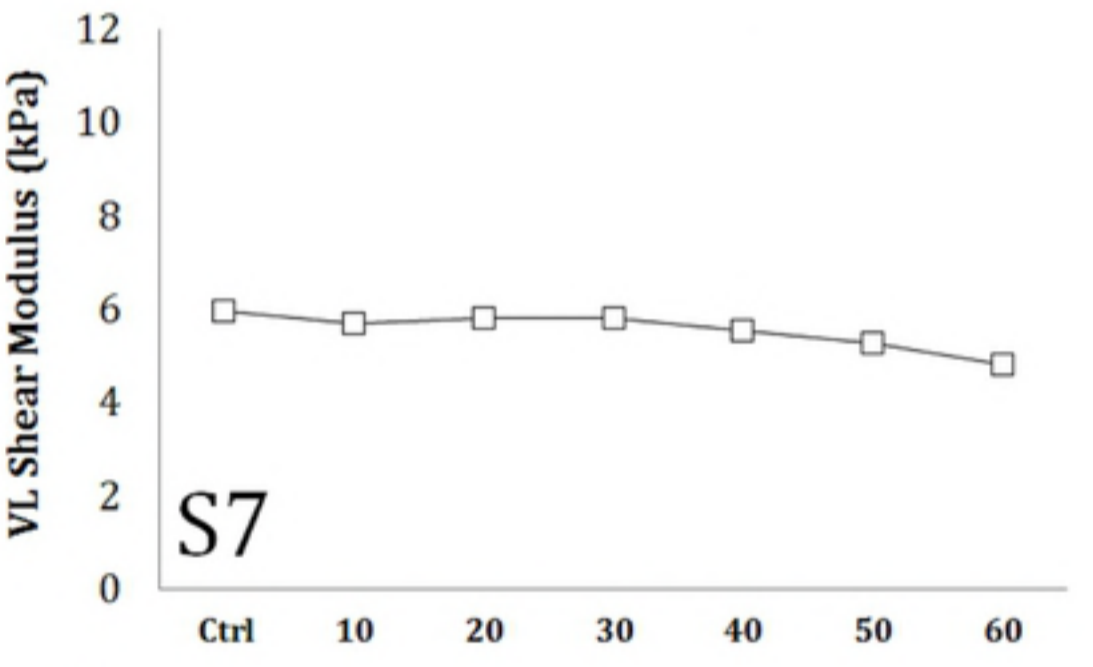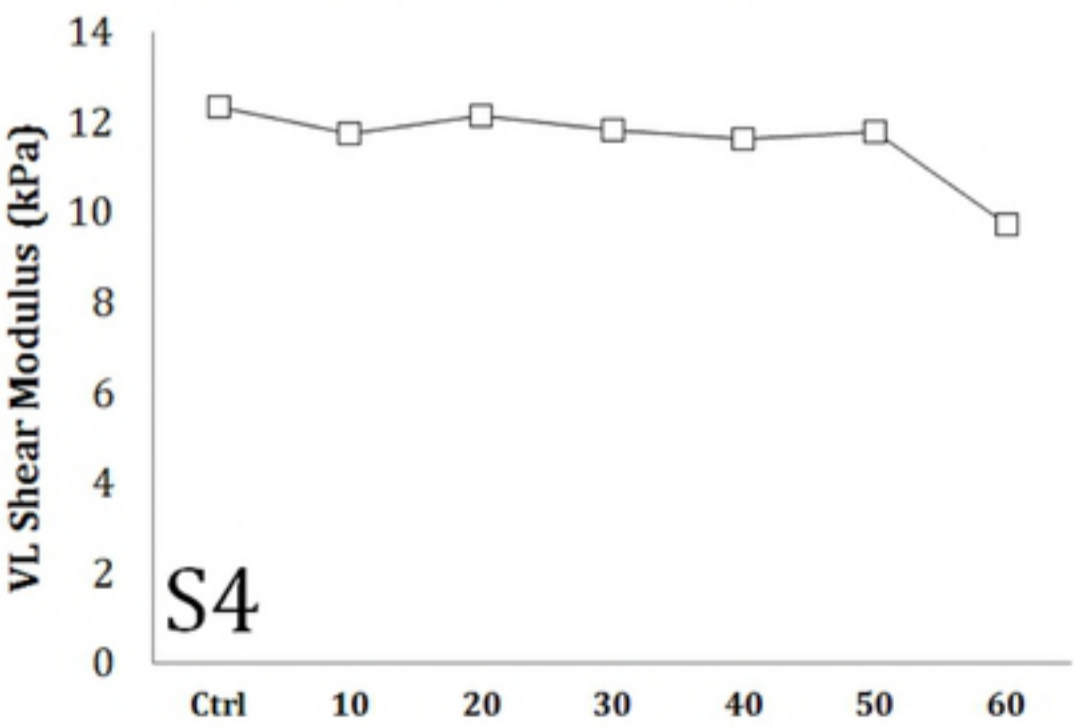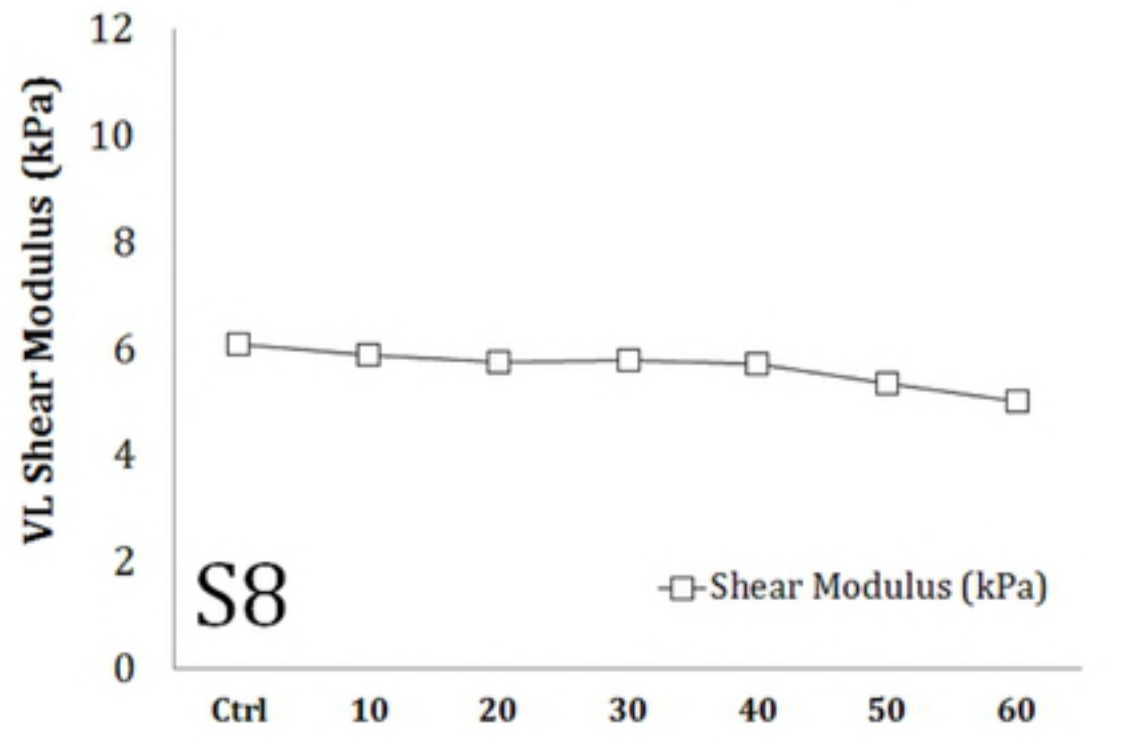

bioRxiv preprint doi: <https://doi.org/10.1101/402644>; this version posted August 28, 2018. The copyright holder for this preprint (which was not certified by peer review) is the author/funder, who has granted bioRxiv a license to display the preprint in perpetuity. It is made available under aCC-BY 4.0 International license.
